# Supplementary material for: Metabolic Drug Response Phenotyping in Colorectal Cancer Organoids by LC-QTOF-MS
Source: Metabolites. 2020 Dec 1;10(12):494. doi: 10.3390/metabo10120494 (PMC7760698; doi:10.3390/metabo10120494)
Supplement: Supplementary file 1 [file metabolites-10-00494-s001.zip › Neef_et_al_Supplementary_Tables_final.xlsx]

## Sheet: Tables Overview
Tables Overview
Table S1	Analytical batch structure
Table S2	Putatively annotated/identified compounds in the HILIC ESI (+) mode
Table S3	Putatively annotated/identified compounds in the HILIC ESI (-) mode
Table S4	Putatively annotated/identified compounds in the RPLC ESI (+) mode
Table S5	Putatively annotated/identified compounds in the RPLC ESI (-) mode
Table S6	Search result from the accurate mass batch search (CEU mass mediator) of compounds found with higher abundance in ECM blank samples - HILIC ESI (+) mode
Table S7	Search result from the accurate mass batch search (CEU mass mediator) of compounds found with higher abundance in ECM blank samples - HILIC ESI (-) mode
Table S8	Search result from the accurate mass batch search (CEU mass mediator) of compounds found with higher abundance in ECM blank samples - RPLC ESI (+) mode
Table S9	Search result from the accurate mass batch search (CEU mass mediator) of compounds found with higher abundance in ECM blank samples - RPLC ESI (-) mode
Table S10	Significantly and relevantly regulated features detected upon 5-flurouracil treatment - all modes
Table S11	Used chemicals and reagents

## Sheet: Table S1
Supplementary Table S1: Analytical batch structure
Sample Type		Injection Volume [µl]
column conditioning	Solvent Blank	20
	(diluted) QC sample	3
	(diluted) QC sample
	(diluted) QC sample
	(diluted) QC sample
	(diluted) QC sample
MS/MS data aquisition	QC sample	20
sample analysis and monitoring of analytical reproducibility	(diluted) QC sample
	5 - 6 samples
	(diluted) QC sample
	5 - 6 samples
	(diluted) QC sample
	5 - 6 samples
	(diluted) QC sample
	[…]
MS/MS data aquisition	(diluted) QC sample
carry over monitoring	Solvent Blank

## Sheet: Table S2
Supplementary Table S2: Putatively annotated/identified compounds in the HILIC ESI (+) mode
Annotation	Formula	SMILES	InChI	Monoisotopic molecular weight	Observed mass	∆ppm	Observed retention time [min]	Retention time difference [min] 3)	MSI assignment level 4)	Search engine score (MS/MS)	Profinder score (max)
Cytosine, in-source fragment of 2'-deoxycytidine 1)	-	-	-	111.043	111.043	1.44088	4.41	-	2	-	-
Cytosine, in-source fragment of 2'-O-methylcytidine 1)	-	-	-	111.043	111.044	2.76168	3.20667	-	2	-	-
7-Methylguanine 1)	C6H7N5O	Cn1cnc2nc(N)[nH]c(=O)c12	InChI=1S/C6H7N5O/c1-11-2-8-4-3(11)5(12)10-6(7)9-4/h2H,1H3,(H3,7,9,10,12)	165.065	165.065	1.57436	3.65	-	2	976 5)	-
Acetylcarnitine 1)	C9H17NO4	CC(=O)OC(CC([O-])=O)C[N+](C)(C)C	InChI=1S/C9H17NO4/c1-7(11)14-8(5-9(12)13)6-10(2,3)4/h8H,5-6H2,1-4H3	203.116	203.116	0	7.61	-	2	982 5)	-
Acylcarnitine 3:0 1)	C10H19NO4	CCC(=O)O[C@H](CC([O-])=O)C[N+](C)(C)C	InChI=1S/C10H19NO4/c1-5-10(14)15-8(6-9(12)13)7-11(2,3)4/h8H,5-7H2,1-4H3/t8-/m1/s1	217.131	217.132	1.80536	6.79	-	2	948 5)	-
Deoxycytidine 1)	C9H13N3O4	Nc1ccn([C@H]2C[C@H](O)[C@@H](CO)O2)c(=O)n1	InChI=1S/C9H13N3O4/c10-7-1-2-12(9(15)11-7)8-3-5(14)6(4-13)16-8/h1-2,5-6,8,13-14H,3-4H2,(H2,10,11,15)/t5-,6+,8+/m0/s1	227.091	227.09	3.5489	4.41	-	2	76.2 6)	-
Acylcarnitine 4:0 1)	C11H21NO4	CCCC(=O)O[C@H](CC([O-])=O)C[N+](C)(C)C	InChI=1S/C11H21NO4/c1-5-6-11(15)16-9(7-10(13)14)8-12(2,3)4/h9H,5-8H2,1-4H3/t9-/m1/s1	231.147	231.147	1.11617	5.945	-	2	84.2 7)	-
2'-Deoxyadenosine 1)	C10H13N5O3	Nc1ncnc2n(cnc12)[C@H]1C[C@H](O)[C@@H](CO)O1	InChI=1S/C10H13N5O3/c11-9-8-10(13-3-12-9)15(4-14-8)7-1-5(17)6(2-16)18-7/h3-7,16-17H,1-2H2,(H2,11,12,13)/t5-,6+,7+/m0/s1	251.102	251.103	3.1594	2.42333	0.0563333	1	91.7 6)	-
2'-O-Metylcytidine 1)	C10H15N3O5	CO[C@@H]1[C@H](O)[C@@H](CO)O[C@H]1n1ccc(N)nc1=O	InChI=1S/C10H15N3O5/c1-17-8-7(15)5(4-14)18-9(8)13-3-2-6(11)12-10(13)16/h2-3,5,7-9,14-15H,4H2,1H3,(H2,11,12,16)/t5-,7-,8-,9-/m1/s1	257.101	257.102	4.00381	3.20667	-0.0193333	1	74.9 6)	-
Inosine 1)	C10H12N4O5	OC[C@H]1O[C@H]([C@H](O)[C@@H]1O)n1cnc2c(O)ncnc12	InChI=1S/C10H12N4O5/c15-1-4-6(16)7(17)10(19-4)14-3-13-5-8(14)11-2-12-9(5)18/h2-4,6-7,10,15-17H,1H2,(H,11,12,18)/t4-,6-,7-,10-/m1/s1	268.081	268.083	7.57229	4.89	-	2	91.1 6)	-
1-Methyladenosine 1)	C11H15N5O4	Cn1cnc2n(cnc2c1=N)[C@@H]1O[C@H](CO)[C@@H](O)[C@H]1O	InChI=1S/C11H15N5O4/c1-15-3-14-10-6(9(15)12)13-4-16(10)11-8(19)7(18)5(2-17)20-11/h3-5,7-8,11-12,17-19H,2H2,1H3/t5-,7-,8-,11-/m1/s1	281.112	281.111	3.39369	7.895	0.034	1	55.6 6)	-
Acylcarnitine 8:0 1)	C15H29NO4	CCCCCCCC(=O)OC(CC([O-])=O)C[N+](C)(C)C	InChI=1S/C15H29NO4/c1-5-6-7-8-9-10-15(19)20-13(11-14(17)18)12-16(2,3)4/h13H,5-12H2,1-4H3	287.21	287.21	0.494412	3.9	-	2	83.2 7)	-
Acylcarnitine 10:0 1)	C17H33NO4	O([C@@H](C[N+](C)(C)C)CC([O-])=O)C(CCCCCCCCC)=O	InChI=1S/C17H33NO4/c1-5-6-7-8-9-10-11-12-17(21)22-15(13-16(19)20)14-18(2,3)4/h15H,5-14H2,1-4H3/t15-/m1/s1	315.241	315.242	3.30366	3.35	-	2	72.9 7)	-
Acylcarnitine 16:0 1)	C23H45NO4	CCCCCCCCCCCCCCCC(=O)O[C@H](CC([O-])=O)C[N+](C)(C)C	InChI=1S/C23H45NO4/c1-5-6-7-8-9-10-11-12-13-14-15-16-17-18-23(27)28-21(19-22(25)26)20-24(2,3)4/h21H,5-20H2,1-4H3/t21-/m1/s1	399.335	399.336	1.60517	2.61	-	2	80.6 6)	-
LysoPC 26:1 1)	C34H68NO7P	C[N+](C)(C)CCOP([O-])(=O)OC[C@@H](CO[*])O[*]	-	633.473	633.474	0.80501	3.775	-	2	82.8 7)	-
PC 28:0 1)	C36H72NO8P	[H][C@@](COC([*])=O)(COP([O-])(=O)OCC[N+](C)(C)C)OC([*])=O	-	677.5	677.497	3.47898	2.14	-	2	96.4 7)	-
PC 29:2 1)	C37H70NO8P	C(C[N+](C)(C)C)OP(=O)([O-])OC[C@H](OC(*)=O)COC(=O)*	-	687.484	687.486	3.77171	2.37	-	2	82.4 7)	-
PE 32:1 1)	C37H72NO8P	[H][C@@](COC([*])=O)(COP([O-])(=O)OCC[NH3+])OC([*])=O	-	689.5	689.496	4.72374	2.35	-	2	73.3 7)	-
PE 34:3 1)	C39H72NO8P	[H][C@@](COC([*])=O)(COP([O-])(=O)OCC[NH3+])OC([*])=O	-	713.5	713.503	4.68842	2.33	-	2	68.8 7)	-
PE 34:1 1)	C39H76NO8P	O(P(=O)(OCCN)O)CC(OC(*)=O)COC(*)=O	-	717.531	717.529	2.86818	2.29	-	2	92.1 7)	-
1-Methyladenosine 2)	C11H15N5O4	Cn1cnc2n(cnc2c1=N)[C@@H]1O[C@H](CO)[C@@H](O)[C@H]1O	InChI=1S/C11H15N5O4/c1-15-3-14-10-6(9(15)12)13-4-16(10)11-8(19)7(18)5(2-17)20-11/h3-5,7-8,11-12,17-19H,2H2,1H3/t5-,7-,8-,11-/m1/s1	281.112	281.113	0.711459	8.034	0.073	3	-	98.8
5-Oxoproline 2)	C5H7NO3	OC(=O)C1CCC(=O)N1	InChI=1S/C5H7NO3/c7-4-2-1-3(6-4)5(8)9/h3H,1-2H2,(H,6,7)(H,8,9)	129.043	129.043	1.54987	8.262	0.021	3	-	99.4
Acetylcarnitine 2)	C9H17NO4	CC(=O)OC(CC([O-])=O)C[N+](C)(C)C	InChI=1S/C9H17NO4/c1-7(11)14-8(5-9(12)13)6-10(2,3)4/h8H,5-6H2,1-4H3	203.116	203.116	1.47699	7.783	0.222	3	-	99.6
Acylcarnitine 10:0 2)	C17H33NO4	O([C@@H](C[N+](C)(C)C)CC([O-])=O)C(CCCCCCCCC)=O	InChI=1S/C17H33NO4/c1-5-6-7-8-9-10-11-12-17(21)22-15(13-16(19)20)14-18(2,3)4/h15H,5-14H2,1-4H3/t15-/m1/s1	315.241	315.242	4.44103	3.62	0.718	3	-	98.5
Acylcarnitine 16:0 2)	C23H45NO4	CCCCCCCCCCCCCCCC(=O)O[C@H](CC([O-])=O)C[N+](C)(C)C	InChI=1S/C23H45NO4/c1-5-6-7-8-9-10-11-12-13-14-15-16-17-18-23(27)28-21(19-22(25)26)20-24(2,3)4/h21H,5-20H2,1-4H3/t21-/m1/s1	399.335	399.335	0.250416	2.804	0.543	3	-	99.4
Acylcarnitine 3:0 2)	C10H19NO4	CCC(=O)O[C@H](CC([O-])=O)C[N+](C)(C)C	InChI=1S/C10H19NO4/c1-5-10(14)15-8(6-9(12)13)7-11(2,3)4/h8H,5-7H2,1-4H3/t8-/m1/s1	217.131	217.131	3.22386	6.96	0.337	3	-	99.8
Acylcarnitine 4:0 2)	C11H21NO4	CCCC(=O)O[C@H](CC([O-])=O)C[N+](C)(C)C	InChI=1S/C11H21NO4/c1-5-6-11(15)16-9(7-10(13)14)8-12(2,3)4/h9H,5-8H2,1-4H3/t9-/m1/s1	231.147	231.147	0.432625	6.152	0.31	3	-	100
Acylcarnitine 6:0 2)	C13H25NO4	C(OC(CCCCC)=O)(C[N+](C)(C)C)CC(=O)[O-]	InChI=1S/C13H25NO4/c1-5-6-7-8-13(17)18-11(9-12(15)16)10-14(2,3)4/h11H,5-10H2,1-4H3	259.178	259.178	0.385834	5.212	0.88	3	-	99.7
Acylcarnitine 8:0 2)	C15H29NO4	CCCCCCCC(=O)OC(CC([O-])=O)C[N+](C)(C)C	InChI=1S/C15H29NO4/c1-5-6-7-8-9-10-15(19)20-13(11-14(17)18)12-16(2,3)4/h13H,5-12H2,1-4H3	287.21	287.209	1.04453	4.196	0.813	3	-	99.7
Adenine 2)	C5H5N5	Nc1ncnc2[nH]cnc12	InChI=1S/C5H5N5/c6-4-3-5(9-1-7-3)10-2-8-4/h1-2H,(H3,6,7,8,9,10)	135.054	135.054	1.48089	2.817	0.057	3	-	99.3
Adenosine 2)	C10H13N5O4	Nc1ncnc2n(cnc12)[C@@H]1O[C@H](CO)[C@@H](O)[C@H]1O	InChI=1S/C10H13N5O4/c11-8-5-9(13-2-12-8)15(3-14-5)10-7(18)6(17)4(1-16)19-10/h2-4,6-7,10,16-18H,1H2,(H2,11,12,13)/t4-,6-,7-,10-/m1/s1	267.097	267.096	4.11837	3.177	-0.034	3	-	99
Betaine 2)	C5H11NO2	C[N+](C)(C)CC([O-])=O	InChI=1S/C5H11NO2/c1-6(2,3)4-5(7)8/h4H2,1-3H3	117.079	117.079	1.70825	7.099	-0.053	3	-	99.8
D-Pantothenic acid 2)	C9H17NO5	CC(C)(CO)[C@@H](O)C(=O)NCCC(O)=O	InChI=1S/C9H17NO5/c1-9(2,5-11)7(14)8(15)10-4-3-6(12)13/h7,11,14H,3-5H2,1-2H3,(H,10,15)(H,12,13)/t7-/m0/s1	219.111	219.111	0.912781	2.983	-0.089	3	-	96.8
Guanidinoacetate 2)	C3H7N3O2	C(CNC(=N)N)(O)=O	InChI=1S/C3H7N3O2/c4-3(5)6-1-2(7)8/h1H2,(H,7,8)(H4,4,5,6)	117.054	117.054	1.70862	9.853	-0.007	3	-	87.9
Inosine 2)	C10H12N4O5	OC[C@H]1O[C@H]([C@H](O)[C@@H]1O)n1cnc2c(O)ncnc12	InChI=1S/C10H12N4O5/c15-1-4-6(16)7(17)10(19-4)14-3-13-5-8(14)11-2-12-9(5)18/h2-4,6-7,10,15-17H,1H2,(H,11,12,18)/t4-,6-,7-,10-/m1/s1	268.081	268.085	15.6667	5.149	-0.363	3	-	99
Isovalerylcarnitine 2)	C12H23NO4	CC(C)CC(=O)OC(CC([O-])=O)C[N+](C)(C)C	InChI=1S/C12H23NO4/c1-9(2)6-12(16)17-10(7-11(14)15)8-13(3,4)5/h9-10H,6-8H2,1-5H3	245.163	245.163	1.63157	5.811	0.712	3	-	99.4
L-Alanine 2)	C3H7NO2	C[C@H](N)C(O)=O	InChI=1S/C3H7NO2/c1-2(4)3(5)6/h2H,4H2,1H3,(H,5,6)/t2-/m0/s1	89.0477	89.0475	2.24599	9.446	-0.106	3	-	100
L-Carnitine 2)	C7H15NO3	C[N+](C)(C)C[C@H](O)CC([O-])=O	InChI=1S/C7H15NO3/c1-8(2,3)5-6(9)4-7(10)11/h6,9H,4-5H2,1-3H3/t6-/m1/s1	161.105	161.105	0.620713	8.909	0.017	3	-	99.6
L-Glutamine 2)	C5H10N2O3	N[C@@H](CCC(N)=O)C(O)=O	InChI=1S/C5H10N2O3/c6-3(5(9)10)1-2-4(7)8/h3H,1-2,6H2,(H2,7,8)(H,9,10)/t3-/m0/s1	146.069	146.069	2.05383	10.409	-0.03	3	-	99.4
LysoPE 16:0 2)	C21H44NO7P	[C@](CO*)(O*)([H])COP(OCCN)(=O)O	-	453.286	453.286	1.10306	5.747	0.017	3	-	83
Methylmalonate 2)	C4H6O4	CC(C(O)=O)C(O)=O	InChI=1S/C4H6O4/c1-2(3(5)6)4(7)8/h2H,1H3,(H,5,6)(H,7,8)	118.027	118.028	8.47259	2.816	0.075	3	-	96
N1-Acetylspermidine 2)	C9H21N3O	CC(=O)NCCCNCCCCN	InChI=1S/C9H21N3O/c1-9(13)12-8-4-7-11-6-3-2-5-10/h11H,2-8,10H2,1H3,(H,12,13)	187.168	187.17	5.87702	11.262	0.311	3	-	100
SM 32:1 2)	C37H75N2O6P	[H][C@](C)(O)[C@]([H])(COP([O-])(=O)OCC[N+](C)(C)C)NC(C)=O	-	674.536	674.536	0.2965	4.024	0.602	3	-	91
SM 34:1 2)	C39H79N2O6P	C[N+](C)(C)CCOP([O-])(=O)OC[C@H](NC([*])=O)[C@H](O)[*]	-	702.568	702.567	0.569341	3.858	0.58	3	-	91.2
SM 34:2 2)	C39H77N2O6P	[H][C@@](O)([*])[C@]([H])(COP([O-])(=O)OCC[N+](C)(C)C)NC([*])=O	-	700.552	700.553	1.14196	3.907	0.613	3	-	84.6
SM 36:2 2)	C41H81N2O6P	C[N+](C)(C)CCOP([O-])(=O)OC[C@H](NC([*])=O)[C@H](O)[*]	-	728.583	728.584	1.23527	3.736	0.588	3	-	73.1
SM 40:2 2)	C45H89N2O6P	C[N+](C)(C)CCOP([O-])(=O)OC[C@H](NC([*])=O)[C@H](O)[*]	-	784.646	784.651	6.49971	3.458	0.487	3	-	95.1
SM 42:2 2)	C47H93N2O6P	C[N+](C)(C)CCOP([O-])(=O)OC[C@H](NC([*])=O)[C@H](O)[*]	-	812.677	812.678	1.10745	3.373	0.472	3	-	89
SN-Glycero-3-phosphocholine 2)	C8H20NO6P	C[N+](C)(C)CCOP([O-])(=O)OC[C@H](O)CO	InChI=1S/C8H20NO6P/c1-9(2,3)4-5-14-16(12,13)15-7-8(11)6-10/h8,10-11H,4-7H2,1-3H3/t8-/m1/s1	257.103	257.103	1.16685	10.452	-0.038	3	-	99.9
1) assigned in the proof of concept experiment
2) assigned via Batch Targeted Feature Extraction in the protocol assessment experiment
3) compared to reference standard or to previously assigned metabolites (Leuthold et al. Comprehensive Metabolomic and Lipidomic Profiling of Human Kidney Tissue: A Platform Comparison. J. Proteome Res. 2017, 16, 933–944)
4) Sumner et al. Proposed minimum reporting standards for chemical analysis Chemical Analysis Working Group (CAWG) Metabolomics Standards Initiative (MSI). Metabolomics 2007, 3, 211–221
5) MassBank of North America
6) PCDL Manager (Agilent)
7) Lipid Annotator (Agilent)
8) CEU Mass Mediator
PC - phosphatidylcholine, PE - phosphatidylethanolamine, SM - sphingomyelin

## Sheet: Table S3
Supplementary Table S3: Putatively annotated/identified compounds in the HILIC ESI (-) mode
Annotation	Formula	SMILES	InChI	Monoisotopic molecular weight	Observed mass	∆ppm	Observed retention time [min]	Retention time difference [min] 3)	MSI assignment level 4)	Search engine score (MS/MS)	Profinder score (max)
2'-Deoxyuridine 1)	C9H12N2O5	OC[C@H]1O[C@H](C[C@@H]1O)n1ccc(=O)[nH]c1=O	InChI=1S/C9H12N2O5/c12-4-6-5(13)3-8(16-6)11-2-1-7(14)10-9(11)15/h1-2,5-6,8,12-13H,3-4H2,(H,10,14,15)/t5-,6+,8+/m0/s1	228.075	228.073	6.51838	2.12333	0.08	2	-	-
1-Methyladenosine 1)	C11H15N5O4	Cn1cnc2n(cnc2c1=N)[C@@H]1O[C@H](CO)[C@@H](O)[C@H]1O	InChI=1S/C11H15N5O4/c1-15-3-14-10-6(9(15)12)13-4-16(10)11-8(19)7(18)5(2-17)20-11/h3-5,7-8,11-12,17-19H,2H2,1H3/t5-,7-,8-,11-/m1/s1	281.112	281.113	1.1	7.85	-0.01	2	-	-
5-Oxoproline 2)	C5H7NO3	OC(=O)C1CCC(=O)N1	InChI=1S/C5H7NO3/c7-4-2-1-3(6-4)5(8)9/h3H,1-2H2,(H,6,7)(H,8,9)	129.043	129.043	6.97439	8.195	-0.046	3	-	99.7
Adenine 2)	C5H5N5	Nc1ncnc2[nH]cnc12	InChI=1S/C5H5N5/c6-4-3-5(9-1-7-3)10-2-8-4/h1-2H,(H3,6,7,8,9,10)	135.054	135.055	2.22132	2.768	0.009	3	-	47.6
Adenosine 2)	C10H13N5O4	Nc1ncnc2n(cnc12)[C@@H]1O[C@H](CO)[C@@H](O)[C@H]1O	InChI=1S/C10H13N5O4/c11-8-5-9(13-2-12-8)15(3-14-5)10-7(18)6(17)4(1-16)19-10/h2-4,6-7,10,16-18H,1H2,(H2,11,12,13)/t4-,6-,7-,10-/m1/s1	267.097	267.1	11.2318	3.133	-0.079	3	-	82.9
Allantoin 2)	C4H6N4O3	NC(=O)NC1NC(=O)NC1=O	InChI=1S/C4H6N4O3/c5-3(10)6-1-2(9)8-4(11)7-1/h1H,(H3,5,6,10)(H2,7,8,9,11)	158.044	158.045	3.7964	4.233	-0.308	3	-	95.5
D-Pantothenic acid 2)	C9H17NO5	CC(C)(CO)[C@@H](O)C(=O)NCCC(O)=O	InChI=1S/C9H17NO5/c1-9(2,5-11)7(14)8(15)10-4-3-6(12)13/h7,11,14H,3-5H2,1-2H3,(H,10,15)(H,12,13)/t7-/m0/s1	219.111	219.11	1.82556	2.943	-0.126	3	-	99.7
Inosine 2)	C10H12N4O5	OC[C@H]1O[C@H]([C@H](O)[C@@H]1O)n1cnc2c(O)ncnc12	InChI=1S/C10H12N4O5/c15-1-4-6(16)7(17)10(19-4)14-3-13-5-8(14)11-2-12-9(5)18/h2-4,6-7,10,15-17H,1H2,(H,11,12,18)/t4-,6-,7-,10-/m1/s1	268.081	268.076	18.2784	5.086	-0.423	3	-	84.9
Lactate 2)	C3H6O3	CC(O)C(O)=O	InChI=1S/C3H6O3/c1-2(4)3(5)6/h2,4H,1H3,(H,5,6)	90.0317	90.0321	4.44286	3.721	-0.303	3	-	100
L-Alanine 2)	C3H7NO2	C[C@H](N)C(O)=O	InChI=1S/C3H7NO2/c1-2(4)3(5)6/h2H,4H2,1H3,(H,5,6)/t2-/m0/s1	89.0477	89.0482	5.61494	9.4	-0.151	3	-	99.7
L-Carnitine 2)	C7H15NO3	C[N+](C)(C)C[C@H](O)CC([O-])=O	InChI=1S/C7H15NO3/c1-8(2,3)5-6(9)4-7(10)11/h6,9H,4-5H2,1-3H3/t6-/m1/s1	161.105	161.106	3.72426	8.867	-0.021	3	-	97.9
L-Glutamine 2)	C5H10N2O3	N[C@@H](CCC(N)=O)C(O)=O	InChI=1S/C5H10N2O3/c6-3(5(9)10)1-2-4(7)8/h3H,1-2,6H2,(H2,7,8)(H,9,10)/t3-/m0/s1	146.069	146.07	4.79223	10.38	-0.061	3	-	99.5
LysoPC 20:3 2)	C28H52NO7P	[H][C@@](COC(C)=O)(COP([O-])(=O)OCC[N+](C)(C)C)OC(C)=O	-	545.348	545.348	0.916846	4.84	0.554	3	-	76.9
LysoPC 20:4 2)	C28H50NO7P	[H][C@@](CO[*])(COP([O-])(=O)OCC[N+](C)(C)C)O[*]	-	543.332	543.339	11.779	4.272	0.485	3	-	89.3
LysoPE 16:0 2)	C21H44NO7P	[C@](CO*)(O*)([H])COP(OCCN)(=O)O	-	453.286	453.287	3.75038	5.596	-0.127	3	-	99
LysoPE 20:4 2)	C25H44NO7P	[C@](CO*)(O*)([H])COP(OCCN)(=O)O	-	501.286	501.288	4.78767	5.463	0.294	3	-	97.3
N-Acetyl-DL-methionine 2)	C7H12NO3S-	CC(NC(C([O-])=O)CCSC)=O	InChI=1S/C7H13NO3S/c1-5(9)8-6(7(10)11)3-4-12-2/h6H,3-4H2,1-2H3,(H,8,9)(H,10,11)/p-1	191.062	191.062	2.61695	3.279	-0.09	3	-	99.6
N-Acetyl-L-alanine 2)	C5H9NO3	C[C@H](NC(C)=O)C(O)=O	InChI=1S/C5H9NO3/c1-3(5(8)9)6-4(2)7/h3H,1-2H3,(H,6,7)(H,8,9)/t3-/m0/s1	131.058	131.059	8.39315	4.732	-0.27	3	-	89.5
PE P-34:1 2)	C39H76NO7P	C(OC[C@H](COP(OCCN)(=O)O)OC(*)=O)=C*	-	701.536	701.53	8.26764	2.259	0.055	3	-	96.1
PI 38:4 2)	C47H83O13P	[C@@H]1([C@@H]([C@@H]([C@@H]([C@H]([C@@H]1O)O)O)O)OP(OC[C@@H](COC(*)=O)OC(=O)*)(=O)O)O	-	886.557	886.559	2.70709	5.981	-0.088	3	-	87.3
PS 38:4 2)	C44H78NO10P	[C@@H](COC(=O)*)(COP(OC[C@@H](C(=O)O)N)(=O)O)OC(=O)*	-	811.536	811.533	3.94315	6.38	0.292	3	-	98.4
PS 36:1 2)	C42H80NO10P	[C@@H](COC(=O)*)(COP(OC[C@@H](C(=O)O)N)(=O)O)OC(=O)*	-	789.552	789.548	5.06619	6.333	0.152	3	-	72
Xanthine 2)	C5H4N4O2	O=c1[nH]c2[nH]cnc2c(=O)[nH]1	InChI=1S/C5H4N4O2/c10-4-2-3(7-1-6-2)8-5(11)9-4/h1H,(H3,6,7,8,9,10,11)	152.033	152.035	7.2352	4.115	-0.175	3	-	98.2
1) assigned in the proof of concept experiment
2) assigned via Batch Targeted Feature Extraction in the protocol assessment experiment
3) compared to reference standard or to previously assigned metabolites (Leuthold et al. Comprehensive Metabolomic and Lipidomic Profiling of Human Kidney Tissue: A Platform Comparison. J. Proteome Res. 2017, 16, 933–944)
4) Sumner et al. Proposed minimum reporting standards for chemical analysis Chemical Analysis Working Group (CAWG) Metabolomics Standards Initiative (MSI). Metabolomics 2007, 3, 211–221
5) MassBank of North America
6) PCDL Manager (Agilent)
7) Lipid Annotator (Agilent)
8) CEU Mass Mediator
PC - phosphatidylcholine, PE - phosphatidylethanolamine, PI - phosphatidylinositol, PS - phosphatidylserine

## Sheet: Table S4
Supplementary Table S4: Putatively annotated/identified compounds in the RPLC ESI (+) mode
Annotation	Formula	SMILES	InChI	Monoisotopic molecular weight	Observed mass	∆ppm	Observed retention time [min]	Retention time difference [min] 3)	MSI assignment level 4)	Search engine score (MS/MS)	Profinder score (max)
PC 28:0 1)	C36H72NO8P	[H][C@@](COC([*])=O)(COP([O-])(=O)OCC[N+](C)(C)C)OC([*])=O	-	677.5	677.504	6.56823	5.97	-	2	93.5 7)	-
PC 30:0 1)	C38H76NO8P	[H][C@@](COC([*])=O)(COP([O-])(=O)OCC[N+](C)(C)C)OC([*])=O	-	705.531	705.534	4.5214	6.745	-	2	913 5)	-
PC 32:0 1)	C40H80NO8P	[H][C@@](COC([*])=O)(COP([O-])(=O)OCC[N+](C)(C)C)OC([*])=O	-	733.562	733.56	3.48983	7.58	-	2	913 5)	-
PC 32:2 1)	C40H76NO8P	[H][C@@](COC([*])=O)(COP([O-])(=O)OCC[N+](C)(C)C)OC([*])=O	-	729.531	729.535	5.26363	6.475	-	2	912 5)	-
PC 30:1 1)	C38H74NO8P	[H][C@@](COC([*])=O)(COP([O-])(=O)OCC[N+](C)(C)C)OC([*])=O	-	703.515	703.52	6.53855	6.33	-	2	90.4 7)	-
PC 30:1 1)	C38H74NO8P	[H][C@@](COC([*])=O)(COP([O-])(=O)OCC[N+](C)(C)C)OC([*])=O	-	703.515	703.52	7.24926	6.2	-	2	90.4 7)	-
PC 36:2 1)	C44H84NO8P	[H][C@@](COC(C)=O)(COP([O-])(=O)OCC[N+](C)(C)C)OC(C)=O	-	785.593	785.59	4.27704	8.13	-	2	913 5)	-
PC 36:3 1)	C44H82NO8P	[H][C@@](COC([*])=O)(COP([O-])(=O)OCC[N+](C)(C)C)OC([*])=O	-	783.578	783.579	1.51867	7.67	-	2	909 5)	-
PC 38:4 1)	C46H84NO8P	[H][C@@](COC([*])=O)(COP([O-])(=O)OCC[N+](C)(C)C)OC([*])=O	-	809.593	809.601	8.81916	7.94	-	2	913 5)	-
PC 38:5 1)	C46H82NO8P	[H][C@@](COC([*])=O)(COP([O-])(=O)OCC[N+](C)(C)C)OC([*])=O	-	807.578	807.586	9.52221	7.76	-	2	89.4 7)	-
PE 34:1 1)	C39H76NO8P	O(P(=O)(OCCN)O)CC(OC(*)=O)COC(*)=O	-	717.531	717.532	2.15332	7.86	-	2	982 5)	-
PE 38:3 1)	C43H80NO8P	O(P(=O)(OCCN)O)CC(OC(*)=O)COC(*)=O	-	769.562	769.563	1.09153	8.75	-	2	91.8 7)	-
PE P-40:5 1)	C45H80NO7P	C(OC[C@H](COP(OCC[NH3+])(=O)[O-])OC(*)=O)=C*	-	777.567	777.568	0.977406	9.05	-	2	0.1071 8)	-
Cer d18:1/16:0 2)	C34H67NO3	CCCCCCCCCCCCCCCC(=O)N[C@@H](CO)[C@H](O)\C=C\CCCCCCCCCCCCC	InChI=1S/C34H67NO3/c1-3-5-7-9-11-13-15-17-19-21-23-25-27-29-33(37)32(31-36)35-34(38)30-28-26-24-22-20-18-16-14-12-10-8-6-4-2/h27,29,32-33,36-37H,3-26,28,30-31H2,1-2H3,(H,35,38)/b29-27+/t32-,33+/m0/s1	537.512	537.504	14.6976	7.471	0.043	3	-	96.1
PC 30:0 2)	C38H76NO8P	[H][C@@](COC([*])=O)(COP([O-])(=O)OCC[N+](C)(C)C)OC([*])=O	-	705.531	705.523	10.6304	6.959	0.023	3	-	100
PC 32:0 2)	C40H80NO8P	[H][C@@](COC([*])=O)(COP([O-])(=O)OCC[N+](C)(C)C)OC([*])=O	-	733.562	733.554	10.7695	7.908	0.048	3	-	99.2
PC 32:1 2)	C40H78NO8P	[H][C@@](COC([*])=O)(COP([O-])(=O)OCC[N+](C)(C)C)OC([*])=O	-	731.547	731.538	10.9359	7.23	0.028	3	-	99.7
PC 32:2 2)	C40H76NO8P	[H][C@@](COC([*])=O)(COP([O-])(=O)OCC[N+](C)(C)C)OC([*])=O	-	729.531	729.524	10.0065	6.587	0.014	3	-	94.4
PC 34:0 2)	C42H84NO8P	[C@](COC(=O)*)(OC(=O)*)([H])COP(OCC[N+](C)(C)C)(=O)[O-]	-	761.593	761.586	10.2418	8.939	0.055	3	-	99.8
PC 34:1 2)	C42H82NO8P	[H][C@@](COC(C)=O)(COP([O-])(=O)OCC[N+](C)(C)C)OC(C)=O	-	759.578	759.569	11.4539	8.193	0.038	3	-	99.3
PC 34:2 2)	C42H80NO8P	[H][C@@](COC(C)=O)(COP([O-])(=O)OCC[N+](C)(C)C)OC(C)=O	-	757.562	757.554	10.2963	7.51	0.044	3	-	98.7
PC 34:3 2)	C42H78NO8P	[H][C@@](COC([*])=O)(COP([O-])(=O)OCC[N+](C)(C)C)OC([*])=O	-	755.547	755.538	11.515	6.927	0.114	3	-	99.9
PC 34:4 2)	C42H76NO8P	[H][C@@](COC([*])=O)(COP([O-])(=O)OCC[N+](C)(C)C)OC([*])=O	-	753.531	753.527	5.7065	7.264	0.045	3	-	83.2
PC 36:0 2)	C44H88NO8P	[C@](COC(=O)*)(OC(=O)*)([H])COP(OCC[N+](C)(C)C)(=O)[O-]	-	789.625	789.614	13.2976	9.996	0.042	3	-	96.4
PC 36:1 2)	C44H86NO8P	[C@](COC(=O)*)(OC(=O)*)([H])COP(OCC[N+](C)(C)C)(=O)[O-]	-	787.609	787.6	11.5541	9.244	0.066	3	-	99.6
PC 36:2 2)	C44H84NO8P	[H][C@@](COC(C)=O)(COP([O-])(=O)OCC[N+](C)(C)C)OC(C)=O	-	785.593	785.586	9.29242	8.523	0.053	3	-	99.2
PC 36:3 2)	C44H82NO8P	[H][C@@](COC([*])=O)(COP([O-])(=O)OCC[N+](C)(C)C)OC([*])=O	-	783.578	783.569	11.4859	7.879	0.144	3	-	99.1
PC 36:4 A 2)	C44H80NO8P	[H][C@@](COC(C)=O)(COP([O-])(=O)OCC[N+](C)(C)C)OC(C)=O	-	781.562	781.553	12.0273	7.526	0.019	3	-	97.5
PC 36:4 B 2)	C44H80NO8P	[H][C@@](COC(C)=O)(COP([O-])(=O)OCC[N+](C)(C)C)OC(C)=O	-	781.562	781.553	11.7714	7.259	0.182	3	-	99.4
PC 36:5 2)	C44H78NO8P	[H][C@@](COC(C)=O)(COP([O-])(=O)OCC[N+](C)(C)C)OC(C)=O	-	779.547	779.538	11.1605	6.961	0.025	3	-	95.9
PC 38:2 2)	C46H88NO8P	[C@](COC(=O)*)(OC(=O)*)([H])COP(OCC[N+](C)(C)C)(=O)[O-]	-	813.625	813.615	11.5534	9.119	-0.254	3	-	99.2
PC 38:3 A 2)	C46H86NO8P	[H][C@@](COC(C)=O)(COP([O-])(=O)OCC[N+](C)(C)C)OC(C)=O	-	811.609	811.601	10.5963	8.884	0.054	3	-	99.7
PC 38:3 B 2)	C46H86NO8P	[H][C@@](COC(C)=O)(COP([O-])(=O)OCC[N+](C)(C)C)OC(C)=O	-	811.609	811.599	12.691	8.735	0.077	3	-	99.7
PC 38:4 A 2)	C46H84NO8P	[H][C@@](COC([*])=O)(COP([O-])(=O)OCC[N+](C)(C)C)OC([*])=O	-	809.593	809.585	10.8698	8.255	0.055	3	-	98.1
PC 38:4 B 2)	C46H84NO8P	[H][C@@](COC([*])=O)(COP([O-])(=O)OCC[N+](C)(C)C)OC([*])=O	-	809.593	809.587	7.5347	8.549	0.048	3	-	70.9
PC 38:5 A 2)	C46H82NO8P	[H][C@@](COC([*])=O)(COP([O-])(=O)OCC[N+](C)(C)C)OC([*])=O	-	807.578	807.568	11.5161	7.933	0.183	3	-	98.9
PC 38:5 B 2)	C46H82NO8P	[H][C@@](COC([*])=O)(COP([O-])(=O)OCC[N+](C)(C)C)OC([*])=O	-	807.578	807.568	11.8875	7.633	0.036	3	-	99.8
PC 38:6 A 2)	C46H80NO8P	[H][C@@](COC(C)=O)(COP([O-])(=O)OCC[N+](C)(C)C)OC(C)=O	-	805.562	805.552	12.538	7.283	0.192	3	-	82.5
PC 38:6 B 2)	C46H80NO8P	[H][C@@](COC(C)=O)(COP([O-])(=O)OCC[N+](C)(C)C)OC(C)=O	-	805.562	805.553	11.4207	7.382	0.029	3	-	82.5
PC 40:5 2)	C48H86NO8P	[H][C@@](COC([*])=O)(COP([O-])(=O)OCC[N+](C)(C)C)OC([*])=O	-	835.609	835.599	11.6084	8.644	-0.04	3	-	99.2
PC O-30:1 2)	C38H76NO7P	C[N+](C)(C)CCOP([O-])(=O)OC[C@@H](CO[*])O[*]	-	689.536	689.53	8.12147	7.447	-0.077	3	-	77.2
PC O-32:1 2)	C40H80NO7P	C[N+](C)([CH2-])CCO[P+]([O-])(=O)OC[C@@H](CO[*])O[*]	-	717.567	717.561	8.36166	8.536	0.058	3	-	70.9
PC O-32:2 2)	C40H78NO7P	C[N+](C)(C)CCOP([O-])(=O)OC[C@@H](CO[*])O[*]	-	715.552	715.547	6.14914	7.756	-0.046	3	-	71.3
PC O-34:0 2)	C42H86NO7P	[H][C@@](CO[*])(COP([O-])(=O)OCC[N+](C)(C)C)O[*]	-	747.614	747.603	14.7137	9.665	0.065	3	-	98.7
PC O-34:1 2)	C42H84NO7P	[H][C@@](CO[*])(COP([O-])(=O)OCC[N+](C)(C)C)O[*]	-	745.598	745.589	12.8757	8.828	0.058	3	-	96.9
PC O-34:2 2)	C42H82NO7P	[H][C@@](CO[*])(COP([O-])(=O)OCC[N+](C)(C)C)O[*]	-	743.583	743.578	6.32079	8.812	0.058	3	-	70.5
PC O-34:3 2)	C42H80NO7P	[H][C@@](CO[*])(COP([O-])(=O)OCC[N+](C)(C)C)O[*]	-	741.567	741.56	9.16985	8.11	0.054	3	-	71.5
PC O-36:4 2)	C44H82NO7P	[H][C@@](CO[*])(COP([O-])(=O)OCC[N+](C)(C)C)O[*]	-	767.583	767.577	7.81681	8.46	0.326	3	-	72.4
PE 38:1 2)	C43H84NO8P	[NH3+]CCOP([O-])(=O)OC[C@@H](COC([*])=O)OC([*])=O	-	689.5	689.5	0.145033	6.959	-0.247	3	-	90.4
PE 34:1 2)	C39H76NO8P	O(P(=O)(OCCN)O)CC(OC(*)=O)COC(*)=O	-	717.531	717.531	0.139367	7.903	-0.233	3	-	94
PE 34:2 2)	C39H74NO8P	O(P(=O)(OCCN)O)CC(OC(*)=O)COC(*)=O	-	715.515	715.515	0.838557	7.228	-0.247	3	-	96.1
PE 36:4 2)	C41H74NO8P	[C@@H](COC(=O)*)(COP(OCCN)(=O)O)OC(=O)*	-	739.515	739.506	12.0351	7.509	0.013	3	-	91.5
PE 38:4 2)	C43H78NO8P	[C@@H](COC(=O)*)(COP(OCCN)(=O)O)OC(=O)*	-	767.547	767.538	11.0744	8.526	0.049	3	-	97.9
PE 36:1 2)	C41H80NO8P	O(P(=O)(OCCN)O)CC(OC(*)=O)COC(*)=O	-	745.562	745.553	11.9374	9.235	0.063	3	-	98.1
PE 36:2 2)	C41H78NO8P	O(P(=O)(OCCN)O)CC(OC(*)=O)COC(*)=O	-	743.547	743.546	0.672453	8.193	-0.261	3	-	85.9
PE 36:3 2)	C41H76NO8P	O(P(=O)(OCCN)O)CC(OC(*)=O)COC(*)=O	-	741.531	741.53	0.674281	7.508	-0.217	3	-	92.9
PE 38:6 2)	C43H74NO8P	O(P(=O)(OCCN)O)CC(OC(*)=O)COC(*)=O	-	763.515	763.516	1.30973	6.961	-0.13	3	-	98.1
PE 38:3 2)	C43H80NO8P	O(P(=O)(OCCN)O)CC(OC(*)=O)COC(*)=O	-	769.562	769.556	7.53681	9.244	0.099	3	-	89.3
PE P-36:4 2)	C41H74NO7P	C(OC[C@H](COP(OCC[NH3+])(=O)[O-])OC(*)=O)=C*	-	723.52	723.511	12.7158	8.098	0.046	3	-	88.4
PE P-38:4 A 2)	C43H78NO7P	C(OC[C@H](COP(OCCN)(=O)O)OC(*)=O)=C*	-	751.552	751.543	11.177	9.107	0.382	3	-	84.7
PE P-38:4 B 2)	C43H78NO7P	C(OC[C@H](COP(OCCN)(=O)O)OC(*)=O)=C*	-	751.552	751.545	8.91497	9.158	0.075	3	-	87.8
SM 34:1 2)	C39H79N2O6P	C[N+](C)(C)CCOP([O-])(=O)OC[C@H](NC([*])=O)[C@H](O)[*]	-	702.568	702.559	11.6716	6.939	0.021	3	-	99.7
SM 34:2 2)	C39H77N2O6P	[H][C@@](O)([*])[C@]([H])(COP([O-])(=O)OCC[N+](C)(C)C)NC([*])=O	-	700.552	700.543	11.9907	6.305	0.008	3	-	99.8
SM 36:2 2)	C41H81N2O6P	C[N+](C)(C)CCOP([O-])(=O)OC[C@H](NC([*])=O)[C@H](O)[*]	-	728.583	728.573	14.1372	7.231	0.031	3	-	98.4
SM 42:1 2)	C47H95N2O6P	C[N+](C)(C)CCOP([O-])(=O)OC[C@H](NC([*])=O)[C@H](O)[*]	-	814.693	814.681	14.6069	11.252	0.107	3	-	98.7
SM 42:2 2)	C47H93N2O6P	C[N+](C)(C)CCOP([O-])(=O)OC[C@H](NC([*])=O)[C@H](O)[*]	-	812.677	812.666	13.5357	10.224	0.089	3	-	99.7
SM 42:3 2)	C47H91N2O6P	C[N+](C)(C)CCOP([O-])(=O)OC[C@H](NC([*])=O)[C@H](O)[*]	-	810.662	810.651	12.4591	9.466	0.079	3	-	97.6
TAG 50:1 2)	C53H100O6	[*]C(=O)OCC(COC([*])=O)OC([*])=O	-	860.783	860.771	13.8248	17.437	0.174	3	-	91.4
TAG 50:2 2)	C53H98O6	[*]C(=O)OCC(COC([*])=O)OC([*])=O	-	830.736	830.726	13.0007	16.184	0.165	3	-	93.8
TAG 52:2 2)	C55H102O6	[*]C(=O)OCC(COC([*])=O)OC([*])=O	-	858.768	858.755	14.7889	16.895	0.173	3	-	93.7
TAG 54:2 2)	C57H106O6	[*]C(=O)OCC(COC([*])=O)OC([*])=O	-	886.799	886.788	12.5171	17.594	0.172	3	-	91.4
TAG 54:3 2)	C57H104O6	[*]C(=O)OCC(COC([*])=O)OC([*])=O	-	884.783	884.771	13.4498	17.071	0.153	3	-	91
TAG 54:4 2)	C57H102O6	[*]C(=O)OCC(COC([*])=O)OC([*])=O	-	882.768	882.758	11.1016	16.518	0.138	3	-	97.8
TAG 54:5 2)	C57H100O6	[*]C(=O)OCC(COC([*])=O)OC([*])=O	-	880.752	880.741	11.9218	15.977	0.168	3	-	94.6
1) assigned in the proof of concept experiment
2) assigned via Batch Targeted Feature Extraction in the protocol assessment experiment
3) compared to reference standard or to previously assigned metabolites (Leuthold et al. Comprehensive Metabolomic and Lipidomic Profiling of Human Kidney Tissue: A Platform Comparison. J. Proteome Res. 2017, 16, 933–944)
4) Sumner et al. Proposed minimum reporting standards for chemical analysis Chemical Analysis Working Group (CAWG) Metabolomics Standards Initiative (MSI). Metabolomics 2007, 3, 211–221
5) MassBank of North America
6) PCDL Manager (Agilent)
7) Lipid Annotator (Agilent)
8) CEU Mass Mediator
Cer - ceramide, PC - phosphatidylcholine, PE - phosphatidylethanolamine, SM - sphingomyelin, TAG - triacylglycerol

## Sheet: Table S5
Supplementary Table S5: Putatively annotated/identified compounds in the RPLC ESI (-) mode
Annotation	Formula	SMILES	InChI	Monoisotopic molecular weight	Observed mass	∆ppm	Observed retention time [min]	Retention time difference [min] 3)	MSI assignment level 4)	Search engine score (MS/MS)	Profinder score (max)
Cer d18:1/16:0 2)	C34H67NO3	CCCCCCCCCCCCCCCC(=O)N[C@@H](CO)[C@H](O)\C=C\CCCCCCCCCCCCC	InChI=1S/C34H67NO3/c1-3-5-7-9-11-13-15-17-19-21-23-25-27-29-33(37)32(31-36)35-34(38)30-28-26-24-22-20-18-16-14-12-10-8-6-4-2/h27,29,32-33,36-37H,3-26,28,30-31H2,1-2H3,(H,35,38)/b29-27+/t32-,33+/m0/s1	537.512	537.512	0.558127	7.476	0.049	3	-	99.8
Cer d18:1/22:0 2)	C40H79NO3	CCCCCCCCCCCCCCCCCCCCCC(=O)N[C@@H](CO)[C@H](O)\C=C\CCCCCCCCCCCCC	InChI=1S/C40H79NO3/c1-3-5-7-9-11-13-15-17-18-19-20-21-22-24-26-28-30-32-34-36-40(44)41-38(37-42)39(43)35-33-31-29-27-25-23-16-14-12-10-8-6-4-2/h33,35,38-39,42-43H,3-32,34,36-37H2,1-2H3,(H,41,44)/b35-33+/t38-,39+/m0/s1	621.606	621.609	4.50444	10.761	0.097	3	-	94.9
Cer d18:1/24:0 2)	C42H83NO3	CCCCCCCCCCCCCCCCCCCCCCCC(=O)N[C@@H](CO)[C@H](O)\C=C\CCCCCCCCCCCCC	InChI=1S/C42H83NO3/c1-3-5-7-9-11-13-15-17-18-19-20-21-22-23-24-26-28-30-32-34-36-38-42(46)43-40(39-44)41(45)37-35-33-31-29-27-25-16-14-12-10-8-6-4-2/h35,37,40-41,44-45H,3-34,36,38-39H2,1-2H3,(H,43,46)/b37-35+/t40-,41+/m0/s1	649.637	649.639	2.15504	11.883	0.113	3	-	97
Cer d18:1/24:1 2)	C42H81NO3	CCCCCCCCCCCCC\C=C\[C@@H](O)[C@H](CO)NC(=O)CCCCCCCCCCCCC\C=C/CCCCCCCC	InChI=1S/C42H81NO3/c1-3-5-7-9-11-13-15-17-18-19-20-21-22-23-24-26-28-30-32-34-36-38-42(46)43-40(39-44)41(45)37-35-33-31-29-27-25-16-14-12-10-8-6-4-2/h17-18,35,37,40-41,44-45H,3-16,19-34,36,38-39H2,1-2H3,(H,43,46)/b18-17-,37-35+/t40-,41+/m0/s1	647.622	647.624	3.70585	10.881	0.089	3	-	94.5
Cholesterol sulfate 2)	C27H46O4S	O(S([O-])(=O)=O)[C@@H]1CC=2[C@]([C@]3(CC[C@]4([C@]([C@@]3(CC2)[H])(CC[C@@]4([C@H](C)CCCC(C)C)[H])[H])C)[H])(C)CC1	InChI=1S/C27H46O4S/c1-18(2)7-6-8-19(3)23-11-12-24-22-10-9-20-17-21(31-32(28,29)30)13-15-26(20,4)25(22)14-16-27(23,24)5/h9,18-19,21-25H,6-8,10-17H2,1-5H3,(H,28,29,30)/p-1/t19-,21+,22+,23-,24+,25+,26+,27-/m1/s1	466.312	466.31	4.289	3.274	0.154	3	-	98.5
HexCer d18:1/16:0 2)	C40H77NO8	CCCCCCCCCCCCCCCC(=O)N[C@@H](COC1OC(CO)C(O)C(O)C1O)[C@H](O)\C=C\CCCCCCCCCCCCC	InChI=1S/C40H77NO8/c1-3-5-7-9-11-13-15-17-19-21-23-25-27-29-34(43)33(32-48-40-39(47)38(46)37(45)35(31-42)49-40)41-36(44)30-28-26-24-22-20-18-16-14-12-10-8-6-4-2/h27,29,33-35,37-40,42-43,45-47H,3-26,28,30-32H2,1-2H3,(H,41,44)/b29-27+/t33-,34+,35?,37?,38?,39?,40?/m0/s1	699.565	699.562	4.57429	6.896	0.048	3	-	98.1
HexCer d18:1/24:0 2)	C48H93NO8	O1[C@@H]([C@@H](O)C(O)C(O)[C@@H]1OC[C@H](NC(=O)CCCCCCCCCCCCCCCCCCCCCCC)[C@H](O)/C=C/CCCCCCCCCCCCC)CO	InChI=1S/C48H93NO8/c1-3-5-7-9-11-13-15-17-18-19-20-21-22-23-24-26-28-30-32-34-36-38-44(52)49-41(40-56-48-47(55)46(54)45(53)43(39-50)57-48)42(51)37-35-33-31-29-27-25-16-14-12-10-8-6-4-2/h35,37,41-43,45-48,50-51,53-55H,3-34,36,38-40H2,1-2H3,(H,49,52)/b37-35+/t41-,42+,43+,45+,46?,47?,48+/m0/s1	811.69	811.692	1.84799	11.12	0.098	3	-	96.4
HexCer d18:1/24:1 2)	C48H91NO8	CCCCCCCCCCCCC\C=C\[C@@H](O)[C@H](CO[C@@H]1O[C@H](CO)[C@H](O)[C@H](O)[C@H]1O)NC(=O)CCCCCCCCCCCCC\C=C/CCCCCCCC	InChI=1S/C48H91NO8/c1-3-5-7-9-11-13-15-17-18-19-20-21-22-23-24-26-28-30-32-34-36-38-44(52)49-41(40-56-48-47(55)46(54)45(53)43(39-50)57-48)42(51)37-35-33-31-29-27-25-16-14-12-10-8-6-4-2/h17-18,35,37,41-43,45-48,50-51,53-55H,3-16,19-34,36,38-40H2,1-2H3,(H,49,52)/b18-17-,37-35+/t41-,42+,43+,45-,46-,47+,48+/m0/s1	809.674	809.674	0	10.112	0.09	3	-	82.9
PC 32:0 2)	C40H80NO8P	[H][C@@](COC([*])=O)(COP([O-])(=O)OCC[N+](C)(C)C)OC([*])=O	-	733.562	733.559	3.95333	7.916	0.061	3	-	98.5
PC 32:1 2)	C40H78NO8P	[H][C@@](COC([*])=O)(COP([O-])(=O)OCC[N+](C)(C)C)OC([*])=O	-	731.547	731.548	1.36697	7.233	0.038	3	-	94.8
PC 34:0 2)	C42H84NO8P	[C@](COC(=O)*)(OC(=O)*)([H])COP(OCC[N+](C)(C)C)(=O)[O-]	-	761.593	761.588	7.61567	8.947	0.068	3	-	98.2
PC 34:1 2)	C42H82NO8P	[H][C@@](COC(C)=O)(COP([O-])(=O)OCC[N+](C)(C)C)OC(C)=O	-	759.578	759.578	0.131652	8.202	0.061	3	-	99.5
PC 34:2 2)	C42H80NO8P	[H][C@@](COC(C)=O)(COP([O-])(=O)OCC[N+](C)(C)C)OC(C)=O	-	757.562	757.564	2.11203	7.512	0.049	3	-	99.2
PC 34:3 2)	C42H78NO8P	[H][C@@](COC([*])=O)(COP([O-])(=O)OCC[N+](C)(C)C)OC([*])=O	-	755.547	755.554	9.39708	6.933	0.121	3	-	98.1
PC 36:1 2)	C44H86NO8P	[C@](COC(=O)*)(OC(=O)*)([H])COP(OCC[N+](C)(C)C)(=O)[O-]	-	787.609	787.609	0.126967	9.252	0.069	3	-	99.5
PC 36:2 2)	C44H84NO8P	[H][C@@](COC(C)=O)(COP([O-])(=O)OCC[N+](C)(C)C)OC(C)=O	-	785.593	785.595	1.78209	8.528	0.079	3	-	99.2
PC 36:3 2)	C44H82NO8P	[H][C@@](COC([*])=O)(COP([O-])(=O)OCC[N+](C)(C)C)OC([*])=O	-	783.578	783.579	2.04191	7.884	0.182	3	-	99.8
PC 36:4 A 2)	C44H80NO8P	[H][C@@](COC(C)=O)(COP([O-])(=O)OCC[N+](C)(C)C)OC(C)=O	-	781.562	781.57	10.1079	7.535	0.033	3	-	92.2
PC 36:4 B 2)	C44H80NO8P	[H][C@@](COC(C)=O)(COP([O-])(=O)OCC[N+](C)(C)C)OC(C)=O	-	781.562	781.57	10.3638	7.266	0.198	3	-	97.3
PC 36:5 2)	C44H78NO8P	[H][C@@](COC(C)=O)(COP([O-])(=O)OCC[N+](C)(C)C)OC(C)=O	-	779.547	779.553	8.46639	6.967	0.008	3	-	86.8
PC 38:2 2)	C46H88NO8P	[C@](COC(=O)*)(OC(=O)*)([H])COP(OCC[N+](C)(C)C)(=O)[O-]	-	813.625	813.625	0.36872	9.13	-0.258	3	-	99.4
PC 38:3 A 2)	C46H86NO8P	[H][C@@](COC(C)=O)(COP([O-])(=O)OCC[N+](C)(C)C)OC(C)=O	-	811.609	811.61	1.35533	8.895	0.068	3	-	99.3
PC 38:4 A 2)	C46H84NO8P	[H][C@@](COC([*])=O)(COP([O-])(=O)OCC[N+](C)(C)C)OC([*])=O	-	809.593	809.594	0.370556	8.263	0.059	3	-	97.3
PC 38:4 B 2)	C46H84NO8P	[H][C@@](COC([*])=O)(COP([O-])(=O)OCC[N+](C)(C)C)OC([*])=O	-	809.593	809.597	4.32314	8.558	0.059	3	-	89.3
PC 38:5 A 2)	C46H82NO8P	[H][C@@](COC([*])=O)(COP([O-])(=O)OCC[N+](C)(C)C)OC([*])=O	-	807.578	807.58	3.21949	7.939	0.193	3	-	96.4
PC 38:5 B 2)	C46H82NO8P	[H][C@@](COC([*])=O)(COP([O-])(=O)OCC[N+](C)(C)C)OC([*])=O	-	807.578	807.579	1.23827	7.64	0.043	3	-	97.9
PC 38:6 B 2)	C46H80NO8P	[H][C@@](COC(C)=O)(COP([O-])(=O)OCC[N+](C)(C)C)OC(C)=O	-	805.562	805.569	9.06191	7.708	0.357	3	-	87
PC 40:5 2)	C48H86NO8P	[H][C@@](COC([*])=O)(COP([O-])(=O)OCC[N+](C)(C)C)OC([*])=O	-	835.609	835.61	0.478692	8.651	-0.026	3	-	99.1
PC O-34:2 2)	C42H82NO7P	[H][C@@](CO[*])(COP([O-])(=O)OCC[N+](C)(C)C)O[*]	-	743.583	743.586	4.43795	8.82	0.065	3	-	71.1
PC O-34:3 2)	C42H80NO7P	[H][C@@](CO[*])(COP([O-])(=O)OCC[N+](C)(C)C)O[*]	-	741.567	741.571	4.58486	8.105	0.059	3	-	76.5
PE 38:4 2)	C43H78NO8P	[C@@H](COC(=O)*)(COP(OCCN)(=O)O)OC(=O)*	-	767.547	767.548	2.21484	8.551	0.059	3	-	90.3
PE 36:1 2)	C41H80NO8P	O(P(=O)(OCCN)O)CC(OC(*)=O)COC(*)=O	-	745.562	745.562	0.93889	9.251	0.074	3	-	99.7
PE 36:2 2)	C41H78NO8P	O(P(=O)(OCCN)O)CC(OC(*)=O)COC(*)=O	-	743.547	743.549	3.22776	8.522	0.086	3	-	97.4
PE 36:3 2)	C41H76NO8P	O(P(=O)(OCCN)O)CC(OC(*)=O)COC(*)=O	-	741.531	741.537	8.0913	7.773	0.04	3	-	71.4
PE 38:3 2)	C43H80NO8P	O(P(=O)(OCCN)O)CC(OC(*)=O)COC(*)=O	-	769.562	769.567	5.84745	8.887	-0.259	3	-	98.9
PE P-36:4 2)	C41H74NO7P	C(OC[C@H](COP(OCC[NH3+])(=O)[O-])OC(*)=O)=C*	-	723.52	723.521	1.1057	8.114	0.064	3	-	98.3
PI 34:2 2)	C43H79O13P	[C@@H]1([C@@H]([C@@H]([C@@H]([C@H]([C@@H]1O)O)O)O)OP(OC[C@@H](COC(*)=O)OC(=O)*)(=O)O)O	-	834.526	834.516	12.2227	5.714	0.194	3	-	91.5
PI 38:3 2)	C47H85O13P	[C@@H]1([C@@H]([C@@H]([C@@H]([C@H]([C@@H]1O)O)O)O)OP(OC[C@@H](COC(*)=O)OC(=O)*)(=O)O)O	-	888.573	888.572	0.5627	6.728	0.278	3	-	99.9
PI 38:4 2)	C47H83O13P	[C@@H]1([C@@H]([C@@H]([C@@H]([C@H]([C@@H]1O)O)O)O)OP(OC[C@@H](COC(*)=O)OC(=O)*)(=O)O)O	-	886.557	886.559	1.91753	6.484	0.283	3	-	99.7
PI 36:2 2)	C45H83O13P	[C@@H]1([C@@H]([C@@H]([C@@H]([C@H]([C@@H]1O)O)O)O)OP(OC[C@@H](COC(*)=O)OC(=O)*)(=O)O)O	-	862.557	862.556	1.27528	6.455	0.254	3	-	99.9
PS 36:1 2)	C42H80NO10P	[C@@H](COC(=O)*)(COP(OC[C@@H](C(=O)O)N)(=O)O)OC(=O)*	-	789.552	789.555	3.67296	7.047	0.018	3	-	99.3
SM 34:1 2)	C39H79N2O6P	C[N+](C)(C)CCOP([O-])(=O)OC[C@H](NC([*])=O)[C@H](O)[*]	-	702.568	702.567	0.142335	6.95	0.048	3	-	99.9
SM 42:1 2)	C47H95N2O6P	C[N+](C)(C)CCOP([O-])(=O)OC[C@H](NC([*])=O)[C@H](O)[*]	-	814.693	814.692	0.736474	11.257	0.101	3	-	99.6
SM 42:2 2)	C47H93N2O6P	C[N+](C)(C)CCOP([O-])(=O)OC[C@H](NC([*])=O)[C@H](O)[*]	-	812.677	812.678	1.35355	10.232	0.088	3	-	95.3
1) assigned in the proof of concept experiment
2) assigned via Batch Targeted Feature Extraction in the protocol assessment experiment
3) compared to reference standard or to previously assigned metabolites (Leuthold et al. Comprehensive Metabolomic and Lipidomic Profiling of Human Kidney Tissue: A Platform Comparison. J. Proteome Res. 2017, 16, 933–944)
4) Sumner et al. Proposed minimum reporting standards for chemical analysis Chemical Analysis Working Group (CAWG) Metabolomics Standards Initiative (MSI). Metabolomics 2007, 3, 211–221
5) MassBank of North America
6) PCDL Manager (Agilent)
7) Lipid Annotator (Agilent)
8) CEU Mass Mediator
Cer - ceramide, HexCer - hexosylceramide, PC - phosphatidylcholine, PE - phosphatidylethanolamine, SM - sphingomyelin, PI - phosphatidylinositol, PS - phosphatidylserine

## Sheet: Table S6
Supplementary Table S6: Search result from the accurate mass batch search (CEU mass mediator) of compounds found with higher abundance in ECM blank samples - HILIC ESI (+) mode
Experimental mass	Identifier	Adduct	mz Error (ppm)	Molecular Weight	Name (proposed annotation by CEU Mass Mediator Batch Search)	Formula	CAS	Kegg	HMDB	LipidMaps	Metlin	PubChem
217.107	153545	M	1	217.106	N-Acetyl-L-citrulline	C8H15N3O4		C15532				656979
	165180	M	2	217.106	N-a-Acetylcitrulline	C8H15N3O4	33965-42-3				5819
	165181	M	2	217.106	Gamma-glutamyl-Alanine	C8H15N3O4					86034
	166735	M	2	217.106	Ala Gly Ala	C8H15N3O4					16009
	166736	M	2	217.106	Ala Ala Gly	C8H15N3O4					17382
	166737	M	2	217.106	Gly Ala Ala	C8H15N3O4					18391
	166738	M	2	217.106	Gln Ala	C8H15N3O4					23736
	166739	M	2	217.106	Ala Gln	C8H15N3O4					23902
	100400	M	2	217.106	N-a-Acetylcitrulline	C8H15N3O4			HMDB0000856			11506771
	90074	M	2	217.106	Alanyl-Glutamine	C8H15N3O4			HMDB0028685		85601	542027
	59638	M	2	217.106	Alanyl-Gamma-glutamate	C8H15N3O4			HMDB0028701		85616	131750731
	147138	M	2	217.106	Glutaminylalanine	C8H15N3O4			HMDB0028790		85704	9813211
	52438	M	5	217.108	5-Hydroxysebacate	C10H17O5			HMDB0029189			131750806
136.038	125526	M	0	136.038	Allopurinol	C5H4N4O	315-30-0		HMDB0014581		865	2094
	144883	M	0	136.038	Hypoxanthine	C5H4N4O	68-94-0	C00262	HMDB0000157		83	790
	138754	M	3	136.038	Ethyl isopropyl disulfide	C5H12S2			HMDB0033054		88946	521477
	129402	M	3	136.038	Ethyl propyl disulfide	C5H12S2	30453-31-7		HMDB0033053		88945	35349
	114082	M	3	136.038	1-Pentanesulfenothioic acid	C5H12S2			HMDB0031160		87453	21251947
	64474	M	10	136.037	L-threonic Acid	C4H8O5	7306-96-9	C01620	HMDB0062620		4244	439535
	116699	M	10	136.037	Threonic acid	C4H8O5	3909-12-4	C21649	HMDB0000943			151152
	139249	M	10	136.037	Erythronic acid	C4H8O5	13752-84-6	C21593	HMDB0000613			2781043
	164061	M	10	136.037	D-threonic acid	C4H8O5					35473
	164062	M	10	136.037	DL-erythronic acid	C4H8O5					35474
	164063	M	10	136.037	Erythronic acid	C4H8O5					45855
	164064	M	10	136.037	Threonic acid	C4H8O5					45859
71.0736	152914	M	1	71.0735	3-Buten-1-amine	C4H9N		C12244			69390	443732
	88541	M	1	71.0735	Pyrrolidine	C4H9N	123-75-1		HMDB0031641		87832	31268
169.074	144951	M	1	169.074	5-Hydroxydopamine	C8H11NO3	1927-04-4		HMDB0004817		7081	114772
	126522	M	1	169.074	6-Hydroxydopamine	C8H11NO3	1199-18-4		HMDB0001537		6307	4624
	98883	M	1	169.074	6-Acetyl-2,3-dihydro-2-(hydroxymethyl)-4(1H)-pyridinone	C8H11NO3			HMDB0035178		90505	15847402
	54635	M	1	169.074	Pyridoxine	C8H11NO3	65-23-6	C00314	HMDB0000239		2202	1054
	123784	M	1	169.074	L- Norepinephrine	C8H11NO3	51-41-2	C00547	HMDB0000216		63	439260
	50599	M	1	169.074	xi-Norepinephrine	C8H11NO3			HMDB0037685			951
334.099	181291	M	1	334.099	Penicillin	C16H18N2O4S						2349
	72548	M	1	334.099	Penicillin G	C16H18N2O4S	61-33-6	C05551	HMDB0015186		1735	5904
	155945	M	2	334.099	Triphenyltetrazolium chloride; 2,3,5-Triphenyltetrazolium chloride	C19H15N4.Cl	298-96-4	C11305			68976	9283
	150023	M	4	334.101	Aramite	C15H23ClO4S	140-57-8	C19019			72770	8809
	130126	M	6	334.101	(S)-a-Amino-2,5-dihydro-5-oxo-4-isoxazolepropanoic acid N2-glucoside	C12H18N2O9			HMDB0029404		86247	131750866
495.333	2628	M	0	495.332	PC(O-14:0/2:0)	C24H50NO7P				LMGP01020019	40048
	2981	M	0	495.332	PC(16:0/0:0)[rac]	C24H50NO7P				LMGP01050113	102768
	4290	M	0	495.332	PE(19:0/0:0)	C24H50NO7P				LMGP02050028	77694
	2969	M	0	495.332	PC(0:0/16:0)	C24H50NO7P			HMDB0240262	LMGP01050074	40340
	163400	M	0	495.332	PC(O-14:0/2:0)[U]	C24H50NO7P					40049
	163401	M	0	495.332	PC(16:0/0:0)[S]	C24H50NO7P					40285
	163402	M	0	495.332	PC(16:0/0:0)[U]	C24H50NO7P					40286
	163403	M	0	495.332	PC(0:0/16:0)[U]	C24H50NO7P					40341
	2940	M	0	495.332	PC(16:0/0:0)	C24H50NO7P			HMDB0010382	LMGP01050018	40284	460602
523.364	4288	M	1	523.364	PE(21:0/0:0)	C26H54NO7P				LMGP02050026	77692
	164538	M	1	523.364	PC(2:0/O-16:0)[U]	C26H54NO7P					40161
	2641	M	1	523.364	PC(O-16:0/2:0)	C26H54NO7P			HMDB0062195	LMGP01020046	40075	108156
	163439	M	1	523.364	PC(O-16:0/2:0)[S]	C26H54NO7P					40076
	163440	M	1	523.364	PC(O-16:0/2:0)[U]	C26H54NO7P					40077
	163441	M	1	523.364	PC(18:0/0:0)[S]	C26H54NO7P					40293
	163442	M	1	523.364	PC(18:0/0:0)[U]	C26H54NO7P					40294
	163443	M	1	523.364	PC(0:0/18:0)[S]	C26H54NO7P					40343
	163444	M	1	523.364	PC(0:0/18:0)[U]	C26H54NO7P					40344
	2944	M	1	523.364	PC(18:0/0:0)	C26H54NO7P			HMDB0010384	LMGP01050026	40292	497299
	2970	M	1	523.364	PC(0:0/18:0)	C26H54NO7P			HMDB0011128	LMGP01050076	40342	24779491
	163438	M	1	523.364	enantio-PAF C-16	C26H54NO7P	117985-57-6				43413
	165818	M	1	523.364	PAF C-16	C26H54NO7P	74389-68-7				34488
56.0626	0	M	0	0	No compounds found for experimental mass 56.0626 and adduct: M
451.123	0	M	0	0	No compounds found for experimental mass 451.1232 and adduct: M
626.158	0	M	0	0	No compounds found for experimental mass 626.158 and adduct: M
521.348	2688	M	1	521.348	PC(O-16:1(11Z)/2:0)	C26H52NO7P				LMGP01020147	40008
	2945	M	1	521.348	PC(18:1(6Z)/0:0)	C26H52NO7P				LMGP01050029	40295
	2946	M	1	521.348	PC(18:1(9E)/0:0)	C26H52NO7P				LMGP01050030	40296
	2971	M	1	521.348	PC(0:0/18:1(6Z))	C26H52NO7P				LMGP01050079	40345
	2972	M	1	521.348	PC(0:0/18:1(9E))	C26H52NO7P				LMGP01050080	40346
	2982	M	1	521.348	PC(18:1(9Z)/0:0)[rac]	C26H52NO7P				LMGP01050114	102769
	2798	M	1	521.348	PC(P-16:0/2:0)	C26H52NO7P				LMGP01030009	40174
	2973	M	1	521.348	PC(0:0/18:1(9Z))	C26H52NO7P			HMDB0062651	LMGP01050082	40348	24779494
	163432	M	1	521.348	PC(18:1(9)/0:0)[U]	C26H52NO7P					40297
	163433	M	1	521.348	PC(0:0/18:1(9E))[U]	C26H52NO7P					40347
	163434	M	1	521.348	PC(0:0/18:1(9Z))[U]	C26H52NO7P					40349
	163435	M	1	521.348	PC(18:1(9E)/0:0)[U]	C26H52NO7P					46689
	2947	M	1	521.348	PC(18:1(9Z)/0:0)	C26H52NO7P	3542-29-8		HMDB0002815	LMGP01050032	184	16081932
	2997	M	1	521.348	LysoPC(18:1(11Z))	C26H52NO7P			HMDB0010385	LMGP01050138	61695	53480465
	163430	M	1	521.348	PC(O-16:1(9E)/2:0)[U]	C26H52NO7P					40009
	163431	M	1	521.348	PC(O-16:1(9Z)/2:0)[U]	C26H52NO7P					40010
313.08	0	M	0	0	No compounds found for experimental mass 313.0803 and adduct: M
164.048	26318	M	1	164.047	9-hydroxy-7E-Nonene-3,5-diynoic acid	C9H8O3				LMFA01030721	74318
	26319	M	1	164.047	9-hydroxy-7Z-Nonene-3,5-diynoic acid	C9H8O3				LMFA01030722	74319
	140824	M	1	164.047	Coumaric acid	C9H8O3	495-79-4	C05838	HMDB0041592		64161	5280841
	54336	M	1	164.047	cis-p-Coumaric acid	C9H8O3	4501-31-9	C06738	HMDB0030677		87135	1549106
	63571	M	1	164.047	Enol-phenylpyruvate	C9H8O3		C02763	HMDB0012225		6098	641637
	139373	M	1	164.047	m-Coumaric acid	C9H8O3	14755-02-3	C12621	HMDB0001713		305	637541
	115347	M	1	164.047	4-Hydroxycinnamic acid	C9H8O3	7400-08-0	C00811	HMDB0002035		6450	637542
	102319	M	1	164.047	2-Hydroxycinnamic acid	C9H8O3	614-60-8	C01772	HMDB0002641		306	637540
	142288	M	1	164.047	Phenylpyruvic acid	C9H8O3	156-06-9	C00166	HMDB0000205		328	997
	104974	M	1	164.047	3-(4-hydroxyphenyl)prop-2-enoic acid	C9H8O3			HMDB0128076			322
	117263	M	1	164.047	3-(2,5-dihydroxyphenyl)prop-2-enal	C9H8O3			HMDB0134030			85638857
	99357	M	1	164.047	3-(2-hydroxyphenyl)prop-2-enoic acid	C9H8O3			HMDB0134028			11968
	148007	M	1	164.047	Methyl Phenylglyoxalate	C9H8O3	15206-55-0		HMDB0062605			84835
	67885	M	1	164.047	3-(4-hydroxyphenyl)oxirane-2-carbaldehyde	C9H8O3			HMDB0141768			131839525
	93746	M	1	164.047	3-(2-hydroxyphenyl)oxirane-2-carbaldehyde	C9H8O3			HMDB0134031			131837795
	86072	M	1	164.047	3-(2,3-dihydroxyphenyl)prop-2-enal	C9H8O3			HMDB0134029
	102232	M	1	164.047	3-(3-hydroxyphenyl)prop-2-enoic acid	C9H8O3			HMDB0125104			11496
	86878	M	1	164.047	3-phenyloxirane-2-carboxylic acid	C9H8O3			HMDB0126545			415606
	83614	M	1	164.047	(2E)-3-(3,4-dihydroxyphenyl)prop-2-enal	C9H8O3		C10945	HMDB0141767		64169	5281871
	79776	M	1	164.047	4-methoxy-1-benzofuran-6-ol	C9H8O3			HMDB0129375			45122636
	156571	M	1	164.047	3-Oxo-3-phenylpropanoate; Benzoylacetate; 3-Oxo-3-phenylpropionate; 3-Oxo-3-phenylpropionic acid	C9H8O3	614-20-0	C07114			66592	97045
	165104	M	1	164.047	p-Coumaric acid	C9H8O3	501-98-4				307
58.0537	0	M	0	0	No compounds found for experimental mass 58.0537 and adduct: M
129.042	152200	M	4	129.043	4-Oxoproline; 4-Oxo-L-proline	C5H7NO3	4347-18-6	C01877			63471	107541
	165047	M	4	129.043	L-1-Pyrroline-3-hydroxy-5-carboxylate	C5H7NO3					63470
	61033	M	4	129.043	(3R,5S)-1-pyrroline-3-hydroxy-5-carboxylic Acid	C5H7NO3		C04281	HMDB0062585			11966267
	100107	M	4	129.043	Pyrroline hydroxycarboxylic acid	C5H7NO3	22573-88-2		HMDB0001369		284	1059
	71983	M	4	129.043	Pyrrolidonecarboxylic acid	C5H7NO3	4042-36-8		HMDB0000805		63632	499
	104759	M	4	129.043	L-Pyroglutamic acid	C5H7NO3	98-79-3	C01879	HMDB0000267		3251	7405
	101779	M	4	129.043	1-Pyrroline-4-hydroxy-2-carboxylate	C5H7NO3		C04282	HMDB0002234		63483	440282
	83387	M	4	129.043	N-Acryloylglycine	C5H7NO3	24599-25-5		HMDB0001843		6343	100321
	117215	M	4	129.043	dimethadione	C5H7NO3			HMDB0061093			3081
	158656	M	4	129.043	5-Oxo-D-proline; D-Pyroglutamic acid; D-5-Pyrrolidone-2-carboxylic acid	C5H7NO3		C02237				439685
183.053	154629	M	1	183.053	3-Carboxy-4-methoxy-N-methyl-2-pyridone	C8H9NO4		C04447			66184	440344
	165138	M	1	183.053	Methyl(2-furoylamino)acetic acid	C8H9NO4					5824
	160537	M	1	183.053	3-Hydroxy-4-hydroxymethyl-2-methylpyridine-5-carboxylate; 5-Pyridoxate; 5-Pyridoxic acid	C8H9NO4		C04773			63862	440474
	152612	M	1	183.053	5-Methoxy-3-hydroxyanthranilate; 5-Methoxy-3-hydroxyanthranilic acid	C8H9NO4		C11466			69051	443219
	161324	M	1	183.053	3,5-Dihydroxy-phenylglycine; L-3,5-Dihydroxyphenylglycine; (S)-3,5-Dihydroxyphenylglycine	C8H9NO4	146255-66-5	C12026			63854	443586
	88910	M	1	183.053	4-Pyridoxic acid	C8H9NO4	82-82-6	C00847	HMDB0000017		239	6723
596.187	0	M	0	0	No compounds found for experimental mass 596.1869 and adduct: M
519.333	2948	M	0	519.332	PC(18:2(2E,4E)/0:0)	C26H50NO7P				LMGP01050034	40300
	100664	M	0	519.332	2-linoleoyl-sn-glycero-3-phosphocholine	C26H50NO7P			HMDB0062711
	163429	M	0	519.332	PC(18:2(9Z,12Z)/0:0)[U]	C26H50NO7P					40302
	2949	M	0	519.332	PC(18:2(9Z,12Z)/0:0)	C26H50NO7P			HMDB0010386	LMGP01050035	40301	11005824
844.165	0	M	0	0	No compounds found for experimental mass 844.1646 and adduct: M
143.073	96023	M	1	143.073	2-Aminonaphthalene	C10H9N	91-59-8	C02227	HMDB0041802		65732	7057
	62287	M	1	143.073	6-Methylquinoline	C10H9N	91-62-3		HMDB0033115		89006	7059
	114141	M	1	143.073	Quinaldine	C10H9N	91-63-4		HMDB0042004		96204	7060
	151415	M	1	143.073	1-Naphthylamine	C10H9N	134-32-7	C14790			70324	8640
260.063	0	M	0	0	No compounds found for experimental mass 260.0633 and adduct: M
207.039	119408	M	2	207.039	2-Amino-4-hydroxy-6-pteridinecarboxylic acid	C7H5N5O3	948-60-7		HMDB0033136		44527	70361
111.069	89357	M	5	111.068	4-Ethyl-2-methyloxazole	C6H9NO			HMDB0037838		92646	525785
	80407	M	5	111.068	N-Acetyl-2,3-dihydro-1H-pyrrole	C6H9NO			HMDB0031163		87456	10909522
	104485	M	5	111.068	2-Ethyl-4-methyloxazole	C6H9NO			HMDB0037837		92645	528405
	138358	M	5	111.068	5-Imino-2-methyl-1-cyclopenten-1-ol	C6H9NO			HMDB0039584		94143	12311489
	138388	M	5	111.068	5-Ethyl-2-methyloxazole	C6H9NO			HMDB0037859		92665	528407
	135838	M	5	111.068	2-Ethyl-5-methyloxazole	C6H9NO			HMDB0037858		92664	528403
	119717	M	5	111.068	Trimethyloxazole	C6H9NO	20662-84-4		HMDB0040148		94688	30215
	149691	M	5	111.068	5-Acetyl-3,4-dihydro-2H-pyrrole	C6H9NO			HMDB0031308		87573	522834
	99015	M	5	111.068	5-Ethyl-4-methyloxazole	C6H9NO	29584-92-7		HMDB0037863		92669	207286
	150432	M	5	111.068	N-Vinyl-2-pyrrolidone; 1-Ethenyl-2-pyrrolidinone	C6H9NO	88-12-0	C19548			73224	6917
275.137	130890	M	1	275.137	Glutarylcarnitine	C12H21NO6			HMDB0013130			71317118
	32662	M	1	275.137	Glutarylcarnitine	C12H21NO6				LMFA07070066
	32687	M	1	275.137	O-glutarylcarnitine	C12H21NO6				LMFA07070091
495.333	2628	M	0	495.332	PC(O-14:0/2:0)	C24H50NO7P				LMGP01020019	40048
	2981	M	0	495.332	PC(16:0/0:0)[rac]	C24H50NO7P				LMGP01050113	102768
	4290	M	0	495.332	PE(19:0/0:0)	C24H50NO7P				LMGP02050028	77694
	2969	M	0	495.332	PC(0:0/16:0)	C24H50NO7P			HMDB0240262	LMGP01050074	40340
	163400	M	0	495.332	PC(O-14:0/2:0)[U]	C24H50NO7P					40049
	163401	M	0	495.332	PC(16:0/0:0)[S]	C24H50NO7P					40285
	163402	M	0	495.332	PC(16:0/0:0)[U]	C24H50NO7P					40286
	163403	M	0	495.332	PC(0:0/16:0)[U]	C24H50NO7P					40341
	2940	M	0	495.332	PC(16:0/0:0)	C24H50NO7P			HMDB0010382	LMGP01050018	40284	460602
194.073	132117	M	3	194.073	2-Hydroxyphenanthrene	C14H10O			HMDB0059798			69061
	122511	M	3	194.073	9-Hydroxyphenanthrene	C14H10O		C11430	HMDB0059801		69034	10229
	108757	M	3	194.073	3-Hydroxyphenanthrene	C14H10O			HMDB0059799			95724
	137463	M	3	194.073	4-Hydroxyphenanthrene	C14H10O			HMDB0059800			82105
	91133	M	3	194.073	1-Hydroxyphenanthrene	C14H10O		C11432	HMDB0059797		69036	98490
	150038	M	3	194.073	Phenanthrene-9,10-oxide	C14H10O	585-08-0	C11429			69033	443196
	152537	M	3	194.073	Phenanthrene-1,2-oxide	C14H10O		C11431			69035	443197
480.394	0	M	0	0	No compounds found for experimental mass 480.3945 and adduct: M
334.099	72548	M	0	334.099	Penicillin G	C16H18N2O4S	61-33-6	C05551	HMDB0015186		1735	5904
	181291	M	0	334.099	Penicillin	C16H18N2O4S						2349
	155945	M	1	334.099	Triphenyltetrazolium chloride; 2,3,5-Triphenyltetrazolium chloride	C19H15N4.Cl	298-96-4	C11305			68976	9283
	150023	M	6	334.101	Aramite	C15H23ClO4S	140-57-8	C19019			72770	8809
	130126	M	8	334.101	(S)-a-Amino-2,5-dihydro-5-oxo-4-isoxazolepropanoic acid N2-glucoside	C12H18N2O9			HMDB0029404		86247	131750866
	170801	M	10	334.095	RG-108	C19H14N2O4	48208-26-0				64811
204.057	0	M	0	0	No compounds found for experimental mass 204.0568 and adduct: M
173.994	0	M	0	0	No compounds found for experimental mass 173.9941 and adduct: M
223.067	0	M	0	0	No compounds found for experimental mass 223.067 and adduct: M
470.137	16428	M	2	470.137	Didymocalyxin B	C28H22O7				LMPK12120331	52134
	114477	M	2	470.137	5-{5-[(E)-2-(3,5-dihydroxyphenyl)ethenyl]-2-(4-hydroxyphenyl)-2,3-dihydro-1-benzofuran-3-yl}benzene-1,2,3-triol	C28H22O7			HMDB0135812			131839307
	126009	M	2	470.137	3-(3,5-dihydroxyphenyl)-2-(4-hydroxyphenyl)-4-[(E)-2-(4-hydroxyphenyl)ethenyl]-2,3-dihydro-1-benzofuran-5,6-diol	C28H22O7			HMDB0129148			131835431
	130362	M	2	470.137	5-[(E)-2-[3-(3,5-dihydroxyphenyl)-2-(4-hydroxyphenyl)-2,3-dihydro-1-benzofuran-5-yl]ethenyl]benzene-1,2,3-triol	C28H22O7			HMDB0135813			131839308
	43067	M	2	470.137	5-[6-hydroxy-2-(4-hydroxyphenyl)-4-[3-(4-hydroxyphenyl)oxiran-2-yl]-2,3-dihydro-1-benzofuran-3-yl]benzene-1,3-diol	C28H22O7			HMDB0129149			131835432
	58209	M	2	470.137	6-[(E)-2-[3-(3,5-dihydroxyphenyl)-2-(4-hydroxyphenyl)-2,3-dihydro-1-benzofuran-5-yl]ethenyl]benzene-1,2,4-triol	C28H22O7			HMDB0135810			131839305
	121461	M	2	470.137	4-[3-(3,5-dihydroxyphenyl)-5-[(E)-2-(3,5-dihydroxyphenyl)ethenyl]-2,3-dihydro-1-benzofuran-2-yl]benzene-1,2-diol	C28H22O7			HMDB0135811			131839306
	108667	M	2	470.137	5-{4-[(E)-2-(3,4-dihydroxyphenyl)ethenyl]-6-hydroxy-2-(4-hydroxyphenyl)-2,3-dihydro-1-benzofuran-3-yl}benzene-1,3-diol	C28H22O7			HMDB0129152			131835434
	96645	M	2	470.137	5-[6-hydroxy-2-(4-hydroxyphenyl)-4-[(E)-2-(4-hydroxyphenyl)ethenyl]-2,3-dihydro-1-benzofuran-3-yl]benzene-1,2,3-triol	C28H22O7			HMDB0129154			131835436
	72838	M	2	470.137	5-{4-[(E)-2-(2,4-dihydroxyphenyl)ethenyl]-6-hydroxy-2-(4-hydroxyphenyl)-2,3-dihydro-1-benzofuran-3-yl}benzene-1,3-diol	C28H22O7			HMDB0129153			131835435
	115870	M	2	470.137	5-{5-[3-(3,5-dihydroxyphenyl)oxiran-2-yl]-2-(4-hydroxyphenyl)-2,3-dihydro-1-benzofuran-3-yl}benzene-1,3-diol	C28H22O7			HMDB0135806			131839302
	103362	M	2	470.137	5-{5-[(E)-2-(3,5-dihydroxyphenyl)ethenyl]-4-hydroxy-2-(4-hydroxyphenyl)-2,3-dihydro-1-benzofuran-3-yl}benzene-1,3-diol	C28H22O7			HMDB0135808			131839304
	52429	M	2	470.137	5-{5-[(E)-2-(3,5-dihydroxyphenyl)ethenyl]-7-hydroxy-2-(4-hydroxyphenyl)-2,3-dihydro-1-benzofuran-3-yl}benzene-1,3-diol	C28H22O7			HMDB0135807			131839303
	69328	M	2	470.137	6-[6-hydroxy-2-(4-hydroxyphenyl)-4-[2-(4-hydroxyphenyl)ethenyl]-2,3-dihydro-1-benzofuran-3-yl]benzene-1,2,4-triol	C28H22O7			HMDB0129150			131835433
	87787	M	2	470.137	5-{5-[(E)-2-(3,5-dihydroxyphenyl)ethenyl]-6-hydroxy-2-(4-hydroxyphenyl)-2,3-dihydro-1-benzofuran-3-yl}benzene-1,3-diol	C28H22O7			HMDB0135805			131839301
	122860	M	2	470.137	4-[3-(3,5-dihydroxyphenyl)-6-hydroxy-4-[(E)-2-(4-hydroxyphenyl)ethenyl]-2,3-dihydro-1-benzofuran-2-yl]benzene-1,2-diol	C28H22O7			HMDB0129151			5458896
223.067	0	M	0	0	No compounds found for experimental mass 223.0671 and adduct: M
187.05	150427	M	10	187.048	(2S,4S)-4-Hydroxy-2,3,4,5-tetrahydrodipicolinate; (2S,4S)-4-Hydroxy-2,3,4,5-tetrahydropyridine-2,6-dicarboxylate; HTPA	C7H9NO5		C20258
	66773	M	10	187.048	1-(Malonylamino)cyclopropanecarboxylic acid	C7H9NO5	80550-27-2		HMDB0031700		87876	133503
	152693	M	10	187.048	2-(Acetamidomethylene)succinate	C7H9NO5		C01215			63871	5280408
83.0374	0	M	0	0	No compounds found for experimental mass 83.0374 and adduct: M
262.078	167541	M	7	262.08	Asp Glu	C9H14N2O7					23953
	167542	M	7	262.08	Glu Asp	C9H14N2O7					23962
	165259	M	7	262.08	Aspartyl-Glutamate	C9H14N2O7					85667
	93285	M	7	262.08	Glutamylaspartic acid	C9H14N2O7	3918-84-1		HMDB0028815		85729	99716
	69458	M	7	262.08	L-beta-aspartyl-L-glutamic acid	C9H14N2O7			HMDB0011164		62013	25207301
	73966	M	7	262.08	gamma-Glutamylaspartic acid	C9H14N2O7	16804-55-0		HMDB0030419		86960	161197
239.089	0	M	0	0	No compounds found for experimental mass 239.0885 and adduct: M
326.197	103553	M	8	326.194	Heptaethylene glycol	C14H30O8	5617-32-3		HMDB0061835			79718
	156418	M	8	326.199	Isoajmaline	C20H26N2O2		C09217				6325415
	161590	M	8	326.199	Ajmaline	C20H26N2O2		C06542				44891335
	67989	M	8	326.199	Ajmaline	C20H26N2O2	4360-12-7		HMDB0015495		3456	441080
	170257	M	8	326.199	Hydroquinine	C20H26N2O2	522-66-7				2235
	152224	M	8	326.199	Hydroquinidine	C20H26N2O2	1435-55-8	C10696			2221	442912
	162505	M	8	326.199	(-)-Tortuosamine; Tortuosamine	C20H26N2O2		C12260			69402	443745
278.057	12868	M	3	278.058	Pongaglabol	C17H10O4				LMPK12110162	48595
	16734	M	3	278.058	4-Hydroxyfurano[2'',3'':6,7]aurone	C17H10O4				LMPK12130024	52439
	12491	M	3	278.058	Neorauteen	C17H10O4				LMPK12070144	48232
255.062	0	M	0	0	No compounds found for experimental mass 255.0622 and adduct: M
208.095	79774	M	1	208.095	Ethyl beta-D-glucopyranoside	C8H16O6	3198-49-0		HMDB0029968		86625	428040
	75752	M	1	208.095	Dambonitol	C8H16O6			HMDB0033942		89632
	166643	M	6	208.096	8-methylcaffeine	C9H12N4O2	832-66-6				84980
202.045	0	M	0	0	No compounds found for experimental mass 202.0454 and adduct: M
509.348	165812	M	0	509.348	1-heptadecanoyl-sn-glycero-3-phosphocholine	C25H52NO7P	50930-23-9				24068
	163415	M	0	509.348	PC(O-15:0/2:0)[U]	C25H52NO7P					40054
	163416	M	0	509.348	PC(16:0/O-1:0)[U]	C25H52NO7P					40158
	163417	M	0	509.348	PC(17:0/0:0)[U]	C25H52NO7P					40291
	163418	M	0	509.348	PC(16:0/O-1:0)	C25H52NO7P					76587
	2943	M	0	509.348	PC(17:0/0:0)	C25H52NO7P			HMDB0012108	LMGP01050024	40290	24779463
	4274	M	0	509.348	PE(20:0/0:0)	C25H52NO7P			HMDB0011511	LMGP02050012	62296	52925131
	4307	M	0	509.348	LysoPE(0:0/20:0)	C25H52NO7P			HMDB0011481	LMGP02050045	62269	53480930
	2618	M	0	509.348	PC(O-1:0/16:0)	C25H52NO7P				LMGP01020004	40033
	2631	M	0	509.348	PC(O-15:0/2:0)	C25H52NO7P				LMGP01020024	40053
	2633	M	0	509.348	PC(O-16:0/1:0)	C25H52NO7P				LMGP01020028	40057
145.11	166013	M	1	145.11	L-Alanine n-butyl ester	C7H15NO2	2885-02-1				3541
	166014	M	1	145.11	2R-aminoheptanoic acid	C7H15NO2					35932
	166015	M	1	145.11	2S-aminoheptanoic acid	C7H15NO2					35933
	166016	M	1	145.11	2-amino-heptanoic acid	C7H15NO2					35934
	166017	M	1	145.11	N2-methyl-L-isoleucine	C7H15NO2	5125-98-8				44542
	166018	M	1	145.11	N,N-dimethyl-L-Valine	C7H15NO2	2812-32-0				44985
	165074	M	1	145.11	1-nitroheptane	C7H15NO2	693-39-0				85267
	27387	M	1	145.11	2R-aminoheptanoic acid	C7H15NO2				LMFA01100013	74866
	27388	M	1	145.11	2S-aminoheptanoic acid	C7H15NO2				LMFA01100014	74867
	107749	M	1	145.11	3-Dehydroxycarnitine	C7H15NO2			HMDB0006831			725
	27389	M	1	145.11	2-Aminoheptanoic acid	C7H15NO2	1115-90-8		HMDB0094649	LMFA01100015	74868	227939
	165743	M	1	145.11	3-Carboxypropyl trimethylammonium	C7H15NO2	6249-56-5				34501
538.111	151462	M	0	538.111	Lithospermic acid	C27H22O12	28831-65-4	C08745			67165	5281302
	106641	M	0	538.111	Isomelitric acid A	C27H22O12			HMDB0039523		94090	21582559
	60860	M	0	538.111	Melitric acid A	C27H22O12			HMDB0040681		95156	10459878
431.194	158094	M	2	431.194	Fusarin C	C23H29NO7		C19243				6435894
	122621	M	2	431.194	Fusarin C	C23H29NO7	79748-81-5		HMDB0033337		72964	131751413
	153268	M	5	431.191	3beta-Chloro-N,N-bis(2-chloroethyl)-androst-5-en-17beta-amine	C23H36Cl3N		C14914			70416	11954081
	151937	M	9	431.19	Glenvastatin; HR 780	C27H26FNO3	122254-45-9	C11699			69164	5281970
189.082	73879	M	3	189.082	Propanoic acid, 2-(methoxyimino)-, trimethylsilyl ester	C7H15NO3Si			HMDB0094703			9601891
	58000	M	4	189.082	S-Prenyl-L-cysteine	C8H15NO2S	5287-46-7		HMDB0012286		62914	5121218
	165145	M	4	189.082	Prenyl-L-cysteine	C8H15NO2S					66519
333.082	181046	M	9	333.085	Fumimycin	C16H15NO7						50907655
324.052	0	M	0	0	No compounds found for experimental mass 324.0524 and adduct: M
844.166	0	M	0	0	No compounds found for experimental mass 844.1662 and adduct: M
572.197	0	M	0	0	No compounds found for experimental mass 572.1973 and adduct: M
260.064	0	M	0	0	No compounds found for experimental mass 260.0642 and adduct: M
465.322	115446	M	0	465.322	TetraHCA	C27H45O6			HMDB0062534			56927964
	3022	M	0	465.322	PC(P-15:0/0:0)	C23H48NO6P				LMGP01070003	40399
	4340	M	0	465.322	PE(O-18:1(9Z)/0:0)	C23H48NO6P				LMGP02060004	46718
	4345	M	0	465.322	PE(P-18:0/0:0)	C23H48NO6P				LMGP02070002	46720
209.051	166647	M	2	209.051	(2R,4R)-2-phenylthiazolidine-4-carboxylic acid	C10H11NO2S					65469
573.309	5517	M	4	573.307	PS(22:4(7Z,10Z,13Z,16Z)/0:0)	C28H48NO9P				LMGP03050014	78841
330.101	0	M	0	0	No compounds found for experimental mass 330.1008 and adduct: M
252.115	159588	M	1	252.115	cis-Hinokiresinol	C17H16O2	17676-24-3	C10628			68443	5281830
	157890	M	1	252.115	p-(3,4-Dihydro-6-methoxy-2-naphthyl)phenol	C17H16O2		C14897			70400	252381
	128014	M	1	252.115	(1Z,4Z)-1,5-bis(4-hydroxyphenyl)-1,4-pentadiene	C17H16O2			HMDB0033317		89171	131751408
	148758	M	1	252.115	2-Phenylethyl 3-phenyl-2-propenoate	C17H16O2	103-53-7		HMDB0035018		90378	5369459
	125873	M	1	252.115	Cinnamyl phenylacetate	C17H16O2	7492-65-1		HMDB0037707		92530	92468421
	43799	M	2	252.116	Cimetidine	C10H16N6S	51481-61-9	C06952	HMDB0014644		1755	2756
396.073	131713	M	8	396.069	3,4,5-trihydroxy-6-{[2-(4-methoxy-1-benzofuran-5-yl)-2-oxoacetyl]oxy}oxane-2-carboxylic acid	C17H16O11			HMDB0129407			131835657
571.227	0	M	0	0	No compounds found for experimental mass 571.2274 and adduct: M
786.658	34349	M	4	786.662	SM(d18:1/22:0)	C45H91N2O6P			HMDB0012103	LMSP03010006	41589	44260125
	64250	M	4	786.662	SM(d18:0/22:1(13Z))	C45H91N2O6P			HMDB0012092			53481362
	34404	M	4	786.662	SM(d16:1/24:0)	C45H91N2O6P				LMSP03010073	83773
376.038	0	M	0	0	No compounds found for experimental mass 376.0379 and adduct: M
540.108	74006	M	6	540.111	6-{2-[3-(3,4-dihydroxy-5-methoxyphenyl)-2-oxopropanoyl]-3,5-dihydroxy-6-methoxyphenoxy}-3,4,5-trihydroxyoxane-2-carboxylic acid	C23H24O15			HMDB0128843			131835140
	129305	M	6	540.111	6-{[3,7-dihydroxy-2-(1-hydroxy-3-methoxy-4-oxocyclohex-2-en-1-yl)-6-methoxy-4-oxo-4H-chromen-5-yl]oxy}-3,4,5-trihydroxyoxane-2-carboxylic acid	C23H24O15			HMDB0128856			131835153
	149795	M	6	540.111	6-{[3,5-dihydroxy-2-(1-hydroxy-5-methoxy-4-oxocyclohex-2-en-1-yl)-6-methoxy-4-oxo-4H-chromen-7-yl]oxy}-3,4,5-trihydroxyoxane-2-carboxylic acid	C23H24O15			HMDB0128854			131835151
	88908	M	6	540.111	6-{[3,5-dihydroxy-2-(1-hydroxy-3-methoxy-4-oxocyclohex-2-en-1-yl)-6-methoxy-4-oxo-4H-chromen-7-yl]oxy}-3,4,5-trihydroxyoxane-2-carboxylic acid	C23H24O15			HMDB0128857			131835154
	98400	M	6	540.111	6-{4-[2,3-dioxo-3-(2,4,6-trihydroxy-3-methoxyphenyl)propyl]-2-hydroxy-6-methoxyphenoxy}-3,4,5-trihydroxyoxane-2-carboxylic acid	C23H24O15			HMDB0128846			131835143
	85622	M	6	540.111	6-{[5,7-dihydroxy-2-(1-hydroxy-3-methoxy-4-oxocyclohex-2-en-1-yl)-6-methoxy-4-oxo-4H-chromen-3-yl]oxy}-3,4,5-trihydroxyoxane-2-carboxylic acid	C23H24O15			HMDB0128858			131835155
	106897	M	6	540.111	6-{4-[3-(3,4-dihydroxy-5-methoxyphenyl)-2-oxopropanoyl]-3,5-dihydroxy-2-methoxyphenoxy}-3,4,5-trihydroxyoxane-2-carboxylic acid	C23H24O15			HMDB0128844			131835141
	78748	M	6	540.111	6-{2-[3-(3,4-dihydroxy-5-methoxyphenyl)-2-oxopropanoyl]-3,5-dihydroxy-4-methoxyphenoxy}-3,4,5-trihydroxyoxane-2-carboxylic acid	C23H24O15			HMDB0128845			131835142
	50334	M	6	540.111	6-{[5,7-dihydroxy-2-(1-hydroxy-5-methoxy-4-oxocyclohex-2-en-1-yl)-6-methoxy-4-oxo-4H-chromen-3-yl]oxy}-3,4,5-trihydroxyoxane-2-carboxylic acid	C23H24O15			HMDB0128855			131835152
	96236	M	6	540.111	6-{[3,7-dihydroxy-2-(1-hydroxy-5-methoxy-4-oxocyclohex-2-en-1-yl)-6-methoxy-4-oxo-4H-chromen-5-yl]oxy}-3,4,5-trihydroxyoxane-2-carboxylic acid	C23H24O15			HMDB0128853			131835150
	102893	M	6	540.111	6-{5-[2,3-dioxo-3-(2,4,6-trihydroxy-3-methoxyphenyl)propyl]-2-hydroxy-3-methoxyphenoxy}-3,4,5-trihydroxyoxane-2-carboxylic acid	C23H24O15			HMDB0128842			131835139
481.315	163389	M	3	481.317	PC(15:0/0:0)[S]	C23H48NO7P					40283
	163390	M	3	481.317	PC(15:0/0:0)[U]	C23H48NO7P					40379
	163391	M	3	481.317	PC(14:0/O-1:0)	C23H48NO7P					76586
	163392	M	3	481.317	PC(7:0/O-8:0)	C23H48NO7P					76591
	2939	M	3	481.317	PC(15:0/0:0)	C23H48NO7P			HMDB0010381	LMGP01050016	40282	24779458
	4264	M	3	481.317	PE(18:0/0:0)	C23H48NO7P		C21484	HMDB0011130	LMGP02050001	40775	9547068
	4300	M	3	481.317	LysoPE(0:0/18:0)	C23H48NO7P			HMDB0011129	LMGP02050038	61992	53480667
245.137	97174	M	1	245.138	Glutaminylvaline	C10H19N3O4			HMDB0028810		85724	57262456
	55576	M	1	245.138	Asparaginyl-Isoleucine	C10H19N3O4			HMDB0028734		85649	17805101
	84814	M	1	245.138	Leucyl-Asparagine	C10H19N3O4			HMDB0028924		85828	4128305
	105822	M	1	245.138	Asparaginyl-Leucine	C10H19N3O4			HMDB0028735		85650	18218182
	50547	M	1	245.138	Valyl-Glutamine	C10H19N3O4			HMDB0029125		86017	5253209
	139917	M	1	245.138	Isoleucyl-Asparagine	C10H19N3O4			HMDB0028902		85808	4414300
	51403	M	1	245.138	Valyl-Gamma-glutamate	C10H19N3O4			HMDB0029141		86033	131750792
	167168	M	1	245.138	Asn Ile	C10H19N3O4					23859
	167169	M	1	245.138	Leu Asn	C10H19N3O4					23960
	167170	M	1	245.138	Ile Asn	C10H19N3O4					24003
	165218	M	1	245.138	Gamma-glutamyl-Valine	C10H19N3O4					86054
	167153	M	1	245.138	Val Ala Gly	C10H19N3O4					16070
	167154	M	1	245.138	Gly Ile Gly	C10H19N3O4					16778
	167155	M	1	245.138	Ala Gly Val	C10H19N3O4					17192
	167156	M	1	245.138	Gly Gly Leu	C10H19N3O4					17722
	167157	M	1	245.138	Gly Val Ala	C10H19N3O4					18620
	167158	M	1	245.138	Gly Ala Val	C10H19N3O4					19531
	167159	M	1	245.138	Val Gly Ala	C10H19N3O4					19654
	167160	M	1	245.138	Leu Gly Gly	C10H19N3O4					19814
	167161	M	1	245.138	Ala Val Gly	C10H19N3O4					20508
	167162	M	1	245.138	Ile Gly Gly	C10H19N3O4					21047
	167163	M	1	245.138	Gly Leu Gly	C10H19N3O4					22420
	167164	M	1	245.138	Gly Gly Ile	C10H19N3O4					23054
	167165	M	1	245.138	Val Gln	C10H19N3O4					23738
	167166	M	1	245.138	Gln Val	C10H19N3O4					23765
	167167	M	1	245.138	Asn Leu	C10H19N3O4					23810
363.135	0	M	0	0	No compounds found for experimental mass 363.1352 and adduct: M
204.162	0	M	0	0	No compounds found for experimental mass 204.1625 and adduct: M
409.29	0	M	0	0	No compounds found for experimental mass 409.2899 and adduct: M
529.008	0	M	0	0	No compounds found for experimental mass 529.0076 and adduct: M
346.075	123160	M	8	346.072	3-[3,4-dihydroxy-5-(3-methylbut-2-en-1-yl)phenyl]-2-(sulfooxy)propanoic acid	C14H18O8S			HMDB0133287			131837222
	145949	M	8	346.072	3-{3-[(3,3-dimethyloxiran-2-yl)methyl]-4-(sulfooxy)phenyl}-2-hydroxypropanoic acid	C14H18O8S			HMDB0133281			131837216
	83515	M	8	346.072	2-hydroxy-3-[3-(4-hydroxy-3-methylbut-2-en-1-yl)-4-(sulfooxy)phenyl]propanoic acid	C14H18O8S			HMDB0133270
	103995	M	8	346.072	2-hydroxy-3-{4-hydroxy-3-[3-methyl-4-(sulfooxy)but-2-en-1-yl]phenyl}propanoic acid	C14H18O8S			HMDB0133271
	75849	M	8	346.072	3-{3-[(3,3-dimethyloxiran-2-yl)methyl]-4-hydroxyphenyl}-2-(sulfooxy)propanoic acid	C14H18O8S			HMDB0133282			131837217
	137840	M	8	346.072	2,3-dihydroxy-3-[3-(3-methylbut-2-en-1-yl)-4-(sulfooxy)phenyl]propanoic acid	C14H18O8S			HMDB0133275			131837211
	60826	M	8	346.072	2-hydroxy-3-[3-hydroxy-5-(3-methylbut-2-en-1-yl)-4-(sulfooxy)phenyl]propanoic acid	C14H18O8S			HMDB0133286			131837221
	125376	M	8	346.072	3-hydroxy-3-[4-hydroxy-3-(3-methylbut-2-en-1-yl)phenyl]-2-(sulfooxy)propanoic acid	C14H18O8S			HMDB0133277			131837212
	59121	M	8	346.072	3-[4-hydroxy-3-(4-hydroxy-3-methylbut-2-en-1-yl)phenyl]-2-(sulfooxy)propanoic acid	C14H18O8S			HMDB0133272
582.15	181211	M	5	582.153	Carbonarin A	C33H26O10						15346515
	181212	M	5	582.153	Carbonarin B	C33H26O10						15346516
601.341	160816	M	1	601.34	Lolitrem K	C37H47NO6		C20533
474.12	13080	M	7	474.116	Apigenin 7-(2''-acetylglucoside)	C23H22O11				LMPK12110374	48805
	13081	M	7	474.116	Apigenin 7-(6''-acetylglucoside)	C23H22O11				LMPK12110375	48806
	11865	M	7	474.116	Fujikinetin 7-O-glucoside	C23H22O11				LMPK12050106	47623
	13154	M	7	474.116	Acacetin 7-(6''-methylglucuronide)	C23H22O11				LMPK12110448	48879
	12909	M	7	474.116	Apigenin 8-C-(6''-acetylgalactoside)	C23H22O11				LMPK12110203	48634
	12943	M	7	474.116	Vitexin 2''-acetate	C23H22O11				LMPK12110237	48668
	11925	M	7	474.116	Genistin 6''-O-acetate	C23H22O11				LMPK12050167	47679
	12980	M	7	474.116	Isovitexin 6''-O-acetyl	C23H22O11				LMPK12110274	48705
	12984	M	7	474.116	Vitexin 3''-O-acetate	C23H22O11				LMPK12110278	48709
	12985	M	7	474.116	Vitexin 6''-O-acetate	C23H22O11				LMPK12110279	48710
	14265	M	7	474.116	Pongamoside D	C23H22O11				LMPK12111561	49980
	12988	M	7	474.116	8-C-beta-D-Glucofuranosylapigenin 2''-O-acetate	C23H22O11				LMPK12110282	48713
	15555	M	7	474.116	Viviparum A	C23H22O11				LMPK12112851	51263
	14030	M	7	474.116	7-Hydroxy-5,8-dimethoxyflavone 7-glucuronide	C23H22O11				LMPK12111326	49750
	14587	M	7	474.116	Kaempferol 3-(2''-acetylrhamnoside)	C23H22O11				LMPK12111883	50299
	14588	M	7	474.116	Kaempferol 3-(3''-acetylrhamnoside)	C23H22O11				LMPK12111884	50300
	14589	M	7	474.116	Kaempferol 3-(4''-acetylrhamnoside)	C23H22O11				LMPK12111885	50301
	13054	M	7	474.116	Apigenin 7-(6''-ethylglucuronide)	C23H22O11				LMPK12110348	48779
	59672	M	7	474.116	Kaempferol 3-(2''-acetylrhamnoside)	C23H22O11			HMDB0039748			14861224
	145218	M	7	474.116	Apigenin 7-O-(2''-O-acetylglucoside)	C23H22O11			HMDB0037341		92273	73829943
	126314	M	7	474.116	4''-O-Acetylafzelin	C23H22O11			HMDB0039746		94298	14861229
	84111	M	7	474.116	Betavulgarin glucoside	C23H22O11			HMDB0041215		95635	131753071
	51130	M	7	474.116	Apigenin 7-O-(6''-O-acetylglucoside)	C23H22O11			HMDB0037342		92274	14325222
	68285	M	7	474.116	3''-O-Acetylafzelin	C23H22O11			HMDB0039747		94299	14861226
	59865	M	7	474.116	6''-O-Acetylgenistin	C23H22O11	73566-30-0		HMDB0029528		86322	22288010
392.17	175520	M	0	392.17	Thr Ser Trp	C18H24N4O6					16282
	175521	M	0	392.17	Ser Thr Trp	C18H24N4O6					16612
	175522	M	0	392.17	Tyr Asn Pro	C18H24N4O6					16705
	175523	M	0	392.17	Pro Tyr Asn	C18H24N4O6					17131
	175524	M	0	392.17	Ser Trp Thr	C18H24N4O6					17545
	175525	M	0	392.17	Pro Asn Tyr	C18H24N4O6					18393
	175526	M	0	392.17	Asn Pro Tyr	C18H24N4O6					18397
	175527	M	0	392.17	Tyr Pro Asn	C18H24N4O6					19067
	175528	M	0	392.17	Thr Trp Ser	C18H24N4O6					19475
	175529	M	0	392.17	Trp Thr Ser	C18H24N4O6					20579
	175530	M	0	392.17	Trp Ser Thr	C18H24N4O6					21554
	175531	M	0	392.17	Asn Tyr Pro	C18H24N4O6					23020
	175532	M	9	392.173	Met Asp Lys	C15H28N4O6S					16741
	175533	M	9	392.173	Asp Met Lys	C15H28N4O6S					17188
	175534	M	9	392.173	Lys Asp Met	C15H28N4O6S					17394
	175535	M	9	392.173	Asp Lys Met	C15H28N4O6S					20366
	175536	M	9	392.173	Met Lys Asp	C15H28N4O6S					22663
	175537	M	9	392.173	Lys Met Asp	C15H28N4O6S					23370
	121320	M	9	392.166	Sparfloxacin	C19H22F2N4O3	110871-86-8	C07662	HMDB0015339		66707	60464
514.1	0	M	0	0	No compounds found for experimental mass 514.1004 and adduct: M
507.333	2931	M	2	507.332	PC(17:1(10Z)/0:0)	C25H50NO7P				LMGP01050002	40268
	2986	M	2	507.332	PC(17:1(9Z)/0:0)	C25H50NO7P				LMGP01050126	76568
	4282	M	2	507.332	PE(20:1(11Z)/0:0)	C25H50NO7P			HMDB0011512	LMGP02050020	62297	52925139
	4308	M	2	507.332	LysoPE(0:0/20:1(11Z))	C25H50NO7P			HMDB0011482	LMGP02050046	62270	53480931
	83264	M	3	507.335	Gymnodimine	C32H45NO4	173792-58-0		HMDB0041430		73510	10436276
	154511	M	3	507.335	Gymnodimine; Gymnodimine A; GYM A	C32H45NO4		C20025
507.369	3017	M	0	507.369	PC(O-18:1(11Z)/0:0)	C26H54NO6P				LMGP01060034	76582
	3018	M	0	507.369	PC(O-18:1(9Z)/0:0)	C26H54NO6P				LMGP01060039	76583
	3026	M	0	507.369	PC(O-18:1(1E)/0:0)	C26H54NO6P				LMGP01070008	40404
	163410	M	0	507.369	PC(O-18:1(9E)/0:0)[S]	C26H54NO6P					40373
	163411	M	0	507.369	PC(O-18:1(9Z)/0:0)[S]	C26H54NO6P					40375
	163412	M	0	507.369	PC(O-18:1(9Z)/0:0)[U]	C26H54NO6P					40376
	3027	M	0	507.369	PC(P-18:0/0:0)	C26H54NO6P			HMDB0013122	LMGP01070009	40405	24779527
500.192	0	M	0	0	No compounds found for experimental mass 500.1918 and adduct: M
258.047	0	M	0	0	No compounds found for experimental mass 258.0468 and adduct: M
521.996	0	M	0	0	No compounds found for experimental mass 521.9965 and adduct: M
126.104	33888	M	6	126.105	4,5-Dimethyl-4-hexen-3-one	C8H14O				LMFA12000237	98230
	30568	M	6	126.105	2,4-Dimethyl-2E,4E-hexadien-1-ol	C8H14O				LMFA05000114	46067
	33726	M	6	126.105	5-Methyl-5E-hepten-2-one	C8H14O				LMFA12000036	98098
	30925	M	6	126.105	2-octenal	C8H14O		C21138		LMFA06000029
	30926	M	6	126.105	3-octenal	C8H14O				LMFA06000030	75310
	30927	M	6	126.105	4-octenal	C8H14O				LMFA06000031	75311
	30929	M	6	126.105	6-octenal	C8H14O				LMFA06000033
	33773	M	6	126.105	4-Methyl-4E-hepten-3-one	C8H14O				LMFA12000095	98126
	33774	M	6	126.105	4S-methyl-1-hepten-3-one	C8H14O				LMFA12000096	98127
	33782	M	6	126.105	4-Methyl-1-hepten-3-one	C8H14O				LMFA12000105	98133
	33783	M	6	126.105	4-Methyl-6-hepten-3-one	C8H14O				LMFA12000108	98134
	33786	M	6	126.105	6-Methyl-2-hepten-4-one	C8H14O				LMFA12000113	98137
	30715	M	6	126.105	1,5Z-Octadien-3-ol	C8H14O				LMFA05000493	96974
	128770	M	6	126.105	(E)-2-octenal	C8H14O	2548-87-0		HMDB0013809		75309	16900
	80406	M	6	126.105	5-Methyl-5-hepten-2-one	C8H14O			HMDB0031591		87791	12663437
	109338	M	6	126.105	2,5-Octadien-1-ol	C8H14O	83861-75-0		HMDB0040146		94686	92468132
	122140	M	6	126.105	(2E,4E)-2,4-Octadien-1-ol	C8H14O	18409-20-6		HMDB0040151		94691	12180845
	79942	M	6	126.105	2-Octenal	C8H14O	2363-89-5		HMDB0030961		87318	6427080
	140110	M	6	126.105	2-Octen-4-one	C8H14O	4643-27-0		HMDB0031301		87568	12409825
	125532	M	6	126.105	6-Methyl-3-hepten-2-one, trans-	C8H14O	20859-10-3		HMDB0032403		88427	5462986
	141672	M	6	126.105	2,4,4-Trimethylcyclopentanone	C8H14O	4694-12-6		HMDB0031197		87486	107324
	48289	M	6	126.105	5-Octen-2-one	C8H14O			HMDB0035390		90686	5352779
	33699	M	6	126.105	3E-octen-2-one	C8H14O			HMDB0033547	LMFA12000009	89357	5363229
	66981	M	6	126.105	(S,E)-Filbertone	C8H14O	122440-59-9		HMDB0035242		90553	89357606
	33701	M	6	126.105	1-Octen-3-one	C8H14O			HMDB0031309	LMFA12000011	87574	61346
	73387	M	6	126.105	2-Ethylidenehexanal	C8H14O	25409-08-9		HMDB0037152		92120	5463946
	90301	M	6	126.105	(3E,5Z)-3,5-Octadien-1-ol	C8H14O			HMDB0040149		94689	87170471
	118462	M	6	126.105	6-Octenal	C8H14O	63826-25-5		HMDB0039769		75313	21158617
	33729	M	6	126.105	6-Methyl-5-hepten-2-one	C8H14O		C07287	HMDB0035915	LMFA12000039	44779	9862
	30928	M	6	126.105	5-octenal	C8H14O			HMDB0039770	LMFA06000032	75312	5283327
	109529	M	6	126.105	3-Methyl-3-hepten-2-one	C8H14O	39899-08-6		HMDB0031590		87790	5364798
	94445	M	6	126.105	4-Octen-3-one	C8H14O	14129-48-7		HMDB0032451		88472	5369061
	30710	M	6	126.105	1,5E-Octadien-3-ol	C8H14O			HMDB0030966	LMFA05000488	87319	6428570
	97787	M	6	126.105	2-Ethyl-2-hexenal	C8H14O			HMDB0061945			5354264
	54705	M	6	126.105	trans-3-cis-8,11,14-eicosatetraenoyl-CoA	C8H14O			HMDB0062471			61018
	107026	M	9	126.103	N(tele)-methylhistaminium	C6H12N3			HMDB0062574			25245502
203.097	0	M	0	0	No compounds found for experimental mass 203.0971 and adduct: M
1482.17	0	M	0	0	No compounds found for experimental mass 1482.167 and adduct: M
412.076	0	M	0	0	No compounds found for experimental mass 412.0762 and adduct: M
876.136	0	M	0	0	No compounds found for experimental mass 876.1358 and adduct: M
575.273	0	M	0	0	No compounds found for experimental mass 575.2725 and adduct: M
523.363	163438	M	1	523.364	enantio-PAF C-16	C26H54NO7P	117985-57-6				43413
	165818	M	1	523.364	PAF C-16	C26H54NO7P	74389-68-7				34488
	2641	M	2	523.364	PC(O-16:0/2:0)	C26H54NO7P			HMDB0062195	LMGP01020046	40075	108156
	163439	M	2	523.364	PC(O-16:0/2:0)[S]	C26H54NO7P					40076
	163440	M	2	523.364	PC(O-16:0/2:0)[U]	C26H54NO7P					40077
	163441	M	2	523.364	PC(18:0/0:0)[S]	C26H54NO7P					40293
	163442	M	2	523.364	PC(18:0/0:0)[U]	C26H54NO7P					40294
	163443	M	2	523.364	PC(0:0/18:0)[S]	C26H54NO7P					40343
	163444	M	2	523.364	PC(0:0/18:0)[U]	C26H54NO7P					40344
	2944	M	2	523.364	PC(18:0/0:0)	C26H54NO7P			HMDB0010384	LMGP01050026	40292	497299
	2970	M	2	523.364	PC(0:0/18:0)	C26H54NO7P			HMDB0011128	LMGP01050076	40342	24779491
	164538	M	2	523.364	PC(2:0/O-16:0)[U]	C26H54NO7P					40161
	4288	M	2	523.364	PE(21:0/0:0)	C26H54NO7P				LMGP02050026	77692
542.106	0	M	0	0	No compounds found for experimental mass 542.1064 and adduct: M
386.097	108569	M	8	386.1	5,7-dihydroxy-2-phenyl-8-(3,4,5-trihydroxyoxan-2-yl)-4H-chromen-4-one	C20H18O8			HMDB0127227			131833592
	148776	M	8	386.1	Dehydrodiferulic dilactone	C20H18O8			HMDB0033876		89585	3703882
	114009	M	8	386.1	8-8'-Dehydrodiferulic acid	C20H18O8			HMDB0029277		86149	131750840
	128192	M	8	386.1	3-[3-Carboxy-2,3-dihydro-2-(4-hydroxy-3-methoxyphenyl)-7-methoxy-5-benzofuranyl]-2-propenoic acid	C20H18O8			HMDB0041277		95691	101088304
	181161	M	8	386.1	5,6-Dimethoxydihydrosterigmatocystin	C20H18O8						5488181
	15872	M	8	386.1	Pollenitin 8-butyrate	C20H18O8				LMPK12113168	51580
	152078	M	8	386.1	Glucosyloxyanthraquinone	C20H18O8		C03503			65990	440032
	158518	M	8	386.1	Daphneticin	C20H18O8	83327-22-4	C09924			68014	158341
	12858	M	8	386.1	Chrysin 5-xyloside	C20H18O8				LMPK12110152	48585
	15967	M	8	386.1	Meliternin	C20H18O8				LMPK12113263	51675
	14185	M	8	386.1	Linderoflavone B	C20H18O8				LMPK12111481	49903
	15728	M	8	386.1	Melisimplexin	C20H18O8				LMPK12113024	51436
	12177	M	8	386.1	Irisflorentin	C20H18O8		C17958		LMPK12050419	47923	170569
	156057	M	8	386.1	Diferulic acid	C20H18O8		C10446			68330	5281770
	13980	M	8	386.1	5,6,7,3'-Tetramethoxy-4',5'-methylenedioxyflavone	C20H18O8				LMPK12111276	49700
	13981	M	8	386.1	5,3',4',5'-Tetramethoxy-6,7-methylenedioxyflavone	C20H18O8				LMPK12111277	49701
	12202	M	8	386.1	5,6,7,8-Tetramethoxy-3',4'-methylenedioxyisoflavone	C20H18O8				LMPK12050444	47948
	156074	M	8	386.1	Cleomiscosin A	C20H18O8	76948-72-6	C09922			68012	442510
	155703	M	8	386.1	Versicolorone	C20H18O8		C20504
	157245	M	8	386.1	5'-Oxoaverantin; 1,3,6,8-Tetrahydroxy-2-[(1S)-1-hydroxy-5-oxohexyl]anthracene-9,10-dione	C20H18O8		C20502
272.077	97471	M	1	272.077	Pyridine N-oxide glucuronide	C11H14NO7			HMDB0061177			131770061
	167756	M	8	272.079	Nimustine	C9H13ClN6O2	42471-28-3				44117
158.084	161319	M	1	158.084	1,5-Naphthalenediamine	C10H10N2	2243-62-1	C19463			73157	16720
	150679	M	1	158.084	Nicotyrine; beta-Nicotyrine	C10H10N2	487-19-4	C10161			68165	10249
	166102	M	1	158.084	1-Benzylimidazole	C10H10N2	4238-71-5				63058
90.047	0	M	0	0	No compounds found for experimental mass 90.047 and adduct: M
337.11	171022	M	8	337.113	Leu Cys Cys	C12H23N3O4S2					16295
	171023	M	8	337.113	Gly Met Met	C12H23N3O4S2					16728
	171024	M	8	337.113	Cys Cys Ile	C12H23N3O4S2					17360
	171025	M	8	337.113	Cys Ile Cys	C12H23N3O4S2					18168
	171026	M	8	337.113	Met Gly Met	C12H23N3O4S2					18555
	171027	M	8	337.113	Met Met Gly	C12H23N3O4S2					20338
	171028	M	8	337.113	Cys Leu Cys	C12H23N3O4S2					21120
	171029	M	8	337.113	Ile Cys Cys	C12H23N3O4S2					21205
	171030	M	8	337.113	Cys Cys Leu	C12H23N3O4S2					21636
194.092	0	M	0	0	No compounds found for experimental mass 194.092 and adduct: M
465.138	0	M	0	0	No compounds found for experimental mass 465.1383 and adduct: M
603.301	0	M	0	0	No compounds found for experimental mass 603.3014 and adduct: M
599.326	159140	M	3	599.325	Penitrem E	C37H45NO6	78213-66-8	C20597
337.1	34034	M	4	337.101	(S)-malyl N-acetyl-alpha-D-glucosaminide	C12H19NO10				LMFA13010059
	65112	M	4	337.098	Benzyl glycinate 4-methylbenzenesulfonate salt	C16H19NO5S	1738-76-7		HMDB0033374		89217	6451311
541.317	2957	M	0	541.317	PC(20:5(5Z,8Z,11Z,14Z,17Z)/0:0)	C28H48NO7P			HMDB0010397	LMGP01050050	40316	11757087
266.095	67075	M	2	266.094	(E)-4-[5-(4-Hydroxyphenoxy)-3-penten-1-ynyl]phenol	C17H14O3			HMDB0041447		95843	131753147
	11761	M	2	266.094	7-Methoxy-2-methylisoflavone	C17H14O3			HMDB0033980	LMPK12050002	47525	354368
	160171	M	2	266.094	Benzarone; 2-Ethyl-3-(4-hydroxybenzoyl)benzofuran	C17H14O3	1477-19-6	C14474			70089	255968
	167621	M	2	266.094	Methoxyvone	C17H14O3					43575
	167622	M	2	266.094	5-methyl-7-methoxyisoflavone	C17H14O3	82517-12-2				84979
326.329	0	M	0	0	No compounds found for experimental mass 326.3291 and adduct: M
770.465	0	M	0	0	No compounds found for experimental mass 770.4646 and adduct: M
252.117	43799	M	3	252.116	Cimetidine	C10H16N6S	51481-61-9	C06952	HMDB0014644		1755	2756
	159588	M	6	252.115	cis-Hinokiresinol	C17H16O2	17676-24-3	C10628			68443	5281830
	157890	M	6	252.115	p-(3,4-Dihydro-6-methoxy-2-naphthyl)phenol	C17H16O2		C14897			70400	252381
	128014	M	6	252.115	(1Z,4Z)-1,5-bis(4-hydroxyphenyl)-1,4-pentadiene	C17H16O2			HMDB0033317		89171	131751408
	148758	M	6	252.115	2-Phenylethyl 3-phenyl-2-propenoate	C17H16O2	103-53-7		HMDB0035018		90378	5369459
	125873	M	6	252.115	Cinnamyl phenylacetate	C17H16O2	7492-65-1		HMDB0037707		92530	92468421
888.564	0	M	0	0	No compounds found for experimental mass 888.5636 and adduct: M
333.998	75049	M	7	334.001	2-Methyl-1,4-naphthalenediol bis(dihydrogen phosphate)	C11H12O8P2	84-98-0		HMDB0032721		88651	8556
453.982	0	M	0	0	No compounds found for experimental mass 453.9817 and adduct: M
492.105	157404	M	3	492.104	Triflusulfuron-methyl	C17H19F3N6O6S	126535-15-7	C18901			72662	92434
	157121	M	10	492.101	L-Threonylcarbamoyladenylate; L-Threonylcarbamoyl-AMP; TC-AMP	C15H21N6O11P		C20641
1587.65	0	M	0	0	No compounds found for experimental mass 1587.654 and adduct: M
494.371	0	M	0	0	No compounds found for experimental mass 494.3708 and adduct: M
319.152	169880	M	3	319.153	Pro Gly Phe	C16H21N3O4					18651
	169881	M	3	319.153	Phe Gly Pro	C16H21N3O4					19171
	169882	M	3	319.153	Pro Phe Gly	C16H21N3O4					20822
	169883	M	3	319.153	Phe Pro Gly	C16H21N3O4					21436
	169884	M	3	319.153	Gly Phe Pro	C16H21N3O4					21913
	169885	M	3	319.153	Gly Pro Phe	C16H21N3O4					22242
354.361	0	M	0	0	No compounds found for experimental mass 354.3606 and adduct: M
457.11	0	M	0	0	No compounds found for experimental mass 457.1101 and adduct: M
455.098	0	M	0	0	No compounds found for experimental mass 455.098 and adduct: M
962.14	0	M	0	0	No compounds found for experimental mass 962.1399 and adduct: M

## Sheet: Table S7
Supplementary Table S7: Search result from the accurate mass batch search (CEU mass mediator) of compounds found with higher abundance in ECM blank samples - HILIC ESI (-) mode
Experimental mass	Identifier	Adduct	mz Error (ppm)	Molecular Weight	Name (proposed annotation by CEU Mass Mediator Batch Search)	Formula	CAS	Kegg	HMDB	LipidMaps	Metlin	PubChem
135.903	0	M	0	0	No compounds found for experimental mass 135.9032 and adduct: M
136.039	125526	M	4	136.038	Allopurinol	C5H4N4O	315-30-0		HMDB0014581		865	2094
	144883	M	4	136.038	Hypoxanthine	C5H4N4O	68-94-0	C00262	HMDB0000157		83	790
	138754	M	7	136.038	Ethyl isopropyl disulfide	C5H12S2			HMDB0033054		88946	521477
	129402	M	7	136.038	Ethyl propyl disulfide	C5H12S2	30453-31-7		HMDB0033053		88945	35349
	114082	M	7	136.038	1-Pentanesulfenothioic acid	C5H12S2			HMDB0031160		87453	21251947
154.876	0	M	0	0	No compounds found for experimental mass 154.8764 and adduct: M
195.913	0	M	0	0	No compounds found for experimental mass 195.913 and adduct: M
209.94	147555	M	2	209.941	1,3,5-Trichloro-2-methoxybenzene	C7H5Cl3O	87-40-1	C11510	HMDB0029643		69083	6884
	151705	M	5	209.941	Cryolite; Aluminum sodium fluoride	Na3AlF6	15096-52-3	C18816				159692
137.9	0	M	0	0	No compounds found for experimental mass 137.9003 and adduct: M
214.887	0	M	0	0	No compounds found for experimental mass 214.8868 and adduct: M
156.873	0	M	0	0	No compounds found for experimental mass 156.8734 and adduct: M
308.118	124241	M	5	308.116	Azacridone A	C18H16N2O3			HMDB0040367		94879	10357912
	114397	M	5	308.116	C.I. Solvent Red 80	C18H16N2O3	6358-53-8	C19214	HMDB0037521		72938
	169290	M	5	308.116	Tyrphostin B44 (-)	C18H16N2O3	133550-32-0				44520
211.937	0	M	0	0	No compounds found for experimental mass 211.937 and adduct: M
268.021	0	M	0	0	No compounds found for experimental mass 268.0209 and adduct: M
262.896	0	M	0	0	No compounds found for experimental mass 262.8959 and adduct: M
368.11	152924	M	1	368.111	5-O-Feruloylquinic acid; O-Feruloylquinate; 3-O-Feruloylquinic acid	C17H20O9		C02572			65790	9799386
	54607	M	1	368.111	3,4,5-trihydroxy-6-{[2-(hydroxymethyl)-2-methyl-2H-chromen-5-yl]oxy}oxane-2-carboxylic acid	C17H20O9			HMDB0126423			131832842
	132198	M	1	368.111	3,4,5-trihydroxy-6-{3-[(5-oxooxolan-2-yl)methyl]phenoxy}oxane-2-carboxylic acid	C17H20O9			HMDB0127742			131834071
	110216	M	1	368.111	3,4,5-trihydroxy-6-[(7-hydroxy-2,2-dimethyl-2H-chromen-5-yl)oxy]oxane-2-carboxylic acid	C17H20O9			HMDB0126419			131832838
	145051	M	1	368.111	3,4,5-trihydroxy-6-[(6-hydroxy-2,2-dimethyl-2H-chromen-5-yl)oxy]oxane-2-carboxylic acid	C17H20O9			HMDB0126421			131832840
	94630	M	1	368.111	3,4,5-trihydroxy-6-[(5-hydroxy-2,2-dimethyl-2H-chromen-6-yl)oxy]oxane-2-carboxylic acid	C17H20O9			HMDB0126420			131832839
	50858	M	1	368.111	3,4,5-trihydroxy-6-[2-methoxy-4-(3-oxobut-1-en-1-yl)phenoxy]oxane-2-carboxylic acid	C17H20O9			HMDB0135673
	135353	M	1	368.111	6-({5,5-dimethyl-3,6-dioxatricyclo[5.4.0.0²,?]undeca-1(11),7,9-trien-11-yl}oxy)-3,4,5-trihydroxyoxane-2-carboxylic acid	C17H20O9			HMDB0126422			131832841
	63226	M	1	368.111	3,4,5-trihydroxy-6-[1-(4-methoxy-1-benzofuran-5-yl)ethoxy]oxane-2-carboxylic acid	C17H20O9			HMDB0129399			131835649
	134139	M	1	368.111	3,4,5-trihydroxy-6-[(5-hydroxy-2,2-dimethyl-2H-chromen-7-yl)oxy]oxane-2-carboxylic acid	C17H20O9			HMDB0126418			131832837
	58119	M	1	368.111	3-O-Feruloylquinic acid	C17H20O9			HMDB0030669		87130	131751068
	124943	M	1	368.111	3-O-Caffeoyl-1-O-methylquinic acid	C17H20O9			HMDB0039959		94501	131752768
	46548	M	1	368.111	3-O-Caffeoyl-4-O-methylquinic acid	C17H20O9			HMDB0039960		94502	131752769
216.884	0	M	0	0	No compounds found for experimental mass 216.8839 and adduct: M
308.118	124241	M	7	308.116	Azacridone A	C18H16N2O3			HMDB0040367		94879	10357912
	114397	M	7	308.116	C.I. Solvent Red 80	C18H16N2O3	6358-53-8	C19214	HMDB0037521		72938
	169290	M	7	308.116	Tyrphostin B44 (-)	C18H16N2O3	133550-32-0				44520
630.15	0	M	0	0	No compounds found for experimental mass 630.1497 and adduct: M
126.909	0	M	0	0	No compounds found for experimental mass 126.9085 and adduct: M
154.876	0	M	0	0	No compounds found for experimental mass 154.8761 and adduct: M
214.022	154325	M	1	214.023	3,5-Dinitroguaiacol	C7H6N2O6		C17101			71560	14345197
	161844	M	9	214.024	2-Deoxy-D-ribose 1-phosphate; 2-Deoxy-alpha-D-ribose 1-phosphate	C5H11O7P		C00672				5460448
	150724	M	9	214.024	2-Deoxy-D-ribose 5-phosphate	C5H11O7P		C00673				439288
	134961	M	9	214.024	Deoxyribose 5-monophosphate	C5H11O7P			HMDB0059654			49866876
	75604	M	9	214.024	Deoxyribose 5-phosphate	C5H11O7P			HMDB0001031		63109	45934311
	138139	M	9	214.024	5-Deoxyribose-1-phosphate	C5H11O7P		C16637	HMDB0060393		71276	24906327
	134069	M	9	214.024	Deoxyribose 1-phosphate	C5H11O7P	17210-42-3		HMDB0001351		3348	439287
	129481	M	9	214.024	1-Deoxy-D-xylulose 5-phosphate	C5H11O7P		C11437	HMDB0001213		6085	443201
	165175	M	9	214.024	2-Deoxy-D-ribose 5-phosphate	C5H11O7P	7685-50-9				3349
243.048	0	M	0	0	No compounds found for experimental mass 243.0478 and adduct: M
316.935	0	M	0	0	No compounds found for experimental mass 316.9347 and adduct: M
314.937	0	M	0	0	No compounds found for experimental mass 314.9373 and adduct: M
220.042	152361	M	1	220.042	Thidiazuron	C9H8N4OS	51707-55-2	C18812			72579	40087
	59974	M	3	220.041	1-Propenyl 1-(1-propenylthio)propyl disulfide	C9H16S3			HMDB0038967		93576	131752500
318.932	0	M	0	0	No compounds found for experimental mass 318.9324 and adduct: M
344.094	0	M	0	0	No compounds found for experimental mass 344.0935 and adduct: M
88.0173	0	M	0	0	No compounds found for experimental mass 88.0173 and adduct: M
298.872	0	M	0	0	No compounds found for experimental mass 298.8716 and adduct: M
344.093	0	M	0	0	No compounds found for experimental mass 344.0931 and adduct: M
300.868	0	M	0	0	No compounds found for experimental mass 300.8683 and adduct: M
294.016	0	M	0	0	No compounds found for experimental mass 294.0159 and adduct: M
172.014	150151	M	4	172.014	sn-Glycerol 1-phosphate; sn-Gro-1-P; L-Glycerol 1-phosphate	C3H9O6P	5746-57-6	C00623				439276
	151017	M	4	172.014	DL-Glycerol 1-phosphate; Glycerol 1-phosphate; Glycerol-3-phosphate; rac-Glycerol 1-phosphate; DL-Glyceryl 1-phosphate; DL-Glycerol 3-phosphate	C3H9O6P		C03189			65927	754
	133570	M	4	172.014	Beta-Glycerophosphoric acid	C3H9O6P	17181-54-3	C02979	HMDB0002520		44760	2526
	88557	M	4	172.014	Glycerol 3-phosphate	C3H9O6P	17989-41-2	C00093	HMDB0000126		5161	439162
251.986	156721	M	8	251.988	Cartilagineal	C10H11Cl3O	53915-35-8	C17102			71561	6385704
425.034	0	M	0	0	No compounds found for experimental mass 425.0341 and adduct: M
282.115	27277	M	1	282.115	3,4-dichloro-tridecanoic acid	C13H24Cl2O2				LMFA01090062	96793
	160720	M	2	282.116	2,3-Diphenyl-3-(2-pyridinyl)acrylonitrile	C20H14N2	39077-64-0	C15084			70577	3003768
391.073	0	M	0	0	No compounds found for experimental mass 391.0728 and adduct: M
467.147	0	M	0	0	No compounds found for experimental mass 467.1475 and adduct: M
435.024	0	M	0	0	No compounds found for experimental mass 435.0237 and adduct: M
204.06	0	M	0	0	No compounds found for experimental mass 204.0601 and adduct: M
214.022	154325	M	1	214.023	3,5-Dinitroguaiacol	C7H6N2O6		C17101			71560	14345197
	161844	M	8	214.024	2-Deoxy-D-ribose 1-phosphate; 2-Deoxy-alpha-D-ribose 1-phosphate	C5H11O7P		C00672				5460448
	150724	M	8	214.024	2-Deoxy-D-ribose 5-phosphate	C5H11O7P		C00673				439288
	134961	M	9	214.024	Deoxyribose 5-monophosphate	C5H11O7P			HMDB0059654			49866876
	75604	M	9	214.024	Deoxyribose 5-phosphate	C5H11O7P			HMDB0001031		63109	45934311
	138139	M	9	214.024	5-Deoxyribose-1-phosphate	C5H11O7P		C16637	HMDB0060393		71276	24906327
	134069	M	9	214.024	Deoxyribose 1-phosphate	C5H11O7P	17210-42-3		HMDB0001351		3348	439287
	129481	M	9	214.024	1-Deoxy-D-xylulose 5-phosphate	C5H11O7P		C11437	HMDB0001213		6085	443201
	165175	M	9	214.024	2-Deoxy-D-ribose 5-phosphate	C5H11O7P	7685-50-9				3349
216.02	0	M	0	0	No compounds found for experimental mass 216.0205 and adduct: M
372.11	173666	M	10	372.106	N-Dealkylzuclopenthixol sulfoxide	C20H21ClN2OS	21642-95-5				3112
450.008	0	M	0	0	No compounds found for experimental mass 450.0083 and adduct: M
278.021	110548	M	5	278.02	Fenthion	C10H15O3PS2	55-38-9	C14420	HMDB0033209		44242	3346
488.178	147531	M	7	488.174	Fucosyllactose	C18H32O15			HMDB0006620		58498	21771334
	95076	M	7	488.174	B-Trisaccharide	C18H32O15			HMDB0006601		58484	53477865
	53906	M	7	488.174	2-Fucosyllactose	C18H32O15	41263-94-9		HMDB0002098		58094	170484
	59368	M	7	488.174	3-Fucosyllactose	C18H32O15			HMDB0002094		58093	161460
	155050	M	7	488.174	beta-D-Glc-(1->4)-alpha-L-Rha-(1->3)-D-Glc; beta-D-Glcp-(1->4)-alpha-L-Rhap-(1->3)-D-Glcp	C18H32O15		C19966			73457
1106.11	78529	M	1	1106.11	Syzyginin A	C48H34O31			HMDB0030236		86822	131750984
268.081	42841	M	2	268.081	Allopurinol riboside	C10H12N4O5	16220-07-8		HMDB0000481		867
	78981	M	2	268.081	Arabinosylhypoxanthine	C10H12N4O5	7013-16-3		HMDB0003040		3022	46874582
	80877	M	2	268.081	Inosine	C10H12N4O5	58-63-9	C00294	HMDB0000195		84	6021
	72941	M	7	268.079	3-Deoxy-D-glycero-D-galacto-2-nonulosonic acid	C9H16O9	22594-61-2		HMDB0000425		5414	22833524
	154326	M	7	268.079	2-O-(alpha-D-Mannosyl)-D-glycerate; alpha-Mannosylglycerate; 2-O-(alpha-D-Mannopyranosyl)-D-glycerate	C9H16O9		C11544			63171	5460194
	155448	M	7	268.079	3-Deoxy-D-glycero-D-galacto-non-2-ulosonic acid; 2-Keto-3-deoxy-D-glycero-D-galacto-nononic acid; KDN; Deaminated neuraminic acid; Ketodeoxynonulonic acid; 3-Deoxy-D-glycero-D-galacto-non-2-ulopyranosonic acid	C9H16O9		C20934
	154296	M	7	268.079	2-O-(alpha-D-Glucopyranosyl)-D-glycerate; (R)-2-(alpha-D-Glucopyranosyloxy)-3-hydroxypropanoate	C9H16O9		C19792
368.894	0	M	0	0	No compounds found for experimental mass 368.8943 and adduct: M
277.985	0	M	0	0	No compounds found for experimental mass 277.9854 and adduct: M
252.023	162579	M	2	252.024	Thiacloprid	C10H9ClN4S	111988-49-9	C18512			72318
	156942	M	4	252.022	3,3'-Dichlorobenzidine	C12H10Cl2N2	91-94-1	C19225			72948	7070
320.93	0	M	0	0	No compounds found for experimental mass 320.9305 and adduct: M
251.953	0	M	0	0	No compounds found for experimental mass 251.953 and adduct: M
224.032	52483	M	1	224.032	Dehydrochorismic acid	C10H8O6			HMDB0036314		91459	9920917
346.091	83726	M	3	346.09	Methyl 6-O-galloyl-beta-D-glucopyranoside	C14H18O10			HMDB0039354		93933	78385296
	131977	M	7	346.088	N1-(2-Hydroxyethyl)flurazepam	C18H16ClFN2O2			HMDB0060853			21498643
289.925	160785	M	9	289.922	2,3,5,6-Tetrachlorobiphenyl; PCB 65	C12H6Cl4	33284-54-7	C14363			69998	36402
	150820	M	9	289.922	2,3,4,4'-Tetrachlorobiphenyl; PCB 60	C12H6Cl4	33025-41-1	C14361			69996	36304
	151588	M	9	289.922	2,3,4,5-Tetrachlorobiphenyl; PCB 61	C12H6Cl4	33284-53-6	C14362			69997	36401
	155438	M	9	289.922	2,4,4',6-Tetrachlorobiphenyl; PCB 75	C12H6Cl4	32598-12-2	C14364			69999	63107
	160902	M	9	289.922	3,4,3',4'-Tetrachlorobiphenyl; PCB 77	C12H6Cl4	32598-13-3	C11057			68802	36187
	155814	M	9	289.922	2,2',4,5-Tetrachlorobiphenyl; PCB 48	C12H6Cl4	70362-47-9	C14360			69995	51041
	158889	M	9	289.922	2,2',4,4'-Tetrachlorobiphenyl; PCB 47	C12H6Cl4	2437-79-8	C14247			69908	17097
	161210	M	9	289.922	3,4,4',5-Tetrachlorobiphenyl; PCB 81	C12H6Cl4	70362-50-4	C18114			72041	51043
	162758	M	9	289.922	2,2',5,5'-Tetrachlorobiphenyl; 2,2',5,5'-TCB; PCB 52	C12H6Cl4	35693-99-3	C14199			69872	37248
287.928	0	M	0	0	No compounds found for experimental mass 287.9282 and adduct: M
294.016	0	M	0	0	No compounds found for experimental mass 294.0159 and adduct: M
247.168	167230	M	1	247.168	Y-27632	C14H21N3O	129830-38-2				44907
346.091	83726	M	2	346.09	Methyl 6-O-galloyl-beta-D-glucopyranoside	C14H18O10			HMDB0039354		93933	78385296
	131977	M	7	346.088	N1-(2-Hydroxyethyl)flurazepam	C18H16ClFN2O2			HMDB0060853			21498643
256.887	0	M	0	0	No compounds found for experimental mass 256.887 and adduct: M
253.95	0	M	0	0	No compounds found for experimental mass 253.9498 and adduct: M
443.146	0	M	0	0	No compounds found for experimental mass 443.1458 and adduct: M
329.051	79057	M	1	329.051	Nitisinone	C14H10F3NO5	104206-65-7		HMDB0014492		85368	115355
	119703	M	4	329.052	Mecarbam	C10H20NO5PS2	2595-54-2	C18661	HMDB0031800		72447	17434
	159189	M	5	329.053	2',3'-Cyclic AMP	C10H12N5O6P		C02353				101812
	114500	M	5	329.053	Cyclic AMP	C10H12N5O6P	60-92-4	C00575	HMDB0000058		92	6076
	48378	M	5	329.053	Adenosine 2',3'-cyclic phosphate	C10H12N5O6P	634-01-5		HMDB0011616		3459	2024
	158806	M	5	329.053	3',5'-Cyclic dGMP	C10H12N5O6P		C02507			3486	439740
220.052	71410	M	0	220.052	N-Acetyl-S-(N-methylcarbamoyl)cysteine	C7H12N2O4S	103974-29-4	C11490	HMDB0041942		69065	108218
	166784	M	0	220.052	Snap	C7H12N2O4S	67776-06-1				44297
	181277	M	7	220.05	8-chloro-9-hydroxy-8,9-deoxyasperlactone	C9H13ClO4						10998579
238.099	58883	M	1	238.099	HEPES	C8H18N2O4S	7365-45-9		HMDB0062295			23830
	140617	M	2	238.099	Cinnamyl benzoate	C16H14O2	50555-04-9		HMDB0029700		86431	5705112
	16286	M	2	238.099	4'-Methoxychalcone	C16H14O2			HMDB0032585	LMPK12120188		641818
	64689	M	2	238.099	Benzyl cinnamate	C16H14O2	103-41-3		HMDB0040286		94811	15558051
	167047	M	2	238.099	4'-Methoxychalcone	C16H14O2	959-33-1				44091
376.101	174135	M	0	376.101	Capsazepine	C19H21ClN2O2S	138977-28-3				45065
	94059	M	1	376.101	Furaneol 4-(6-malonylglucoside)	C15H20O11			HMDB0029778		86485	131750900
	27334	M	7	376.104	Ethyl 18-bromooctadec-17-en-5,7,15-triynoate	C20H25BrO2				LMFA01090119	96846
	87735	M	8	376.098	{4-[(E)-2-{3,5-dihydroxy-4-[(1E)-3-methylbut-1-en-1-yl]phenyl}ethenyl]phenyl}oxidanesulfonic acid	C19H20O6S			HMDB0128996			131835282
557.312	1670	M	1	557.312	PC(6:2(3E,5E)/14:2(11E,13E))	C28H48NO8P				LMGP01011236	39970
	163496	M	1	557.312	PC(10:2(2E,4E)/10:2(2E,4E))[S]	C28H48NO8P					39147
506.09	0	M	0	0	No compounds found for experimental mass 506.0903 and adduct: M
399.109	176015	M	2	399.11	Asp Cys Tyr	C16H21N3O7S					16258
	176016	M	2	399.11	Cys Asp Tyr	C16H21N3O7S					19400
	176017	M	2	399.11	Cys Tyr Asp	C16H21N3O7S					19641
	176018	M	2	399.11	Tyr Cys Asp	C16H21N3O7S					21048
	176019	M	2	399.11	Tyr Asp Cys	C16H21N3O7S					21231
	176020	M	2	399.11	Asp Tyr Cys	C16H21N3O7S					22293
	119053	M	5	399.107	6-[(6-carboxy-3,4,5-trihydroxyoxan-2-yl)oxy]-2-phenyl-1??-chromen-1-ylium	C21H19O8			HMDB0133416			131837323
	62481	M	5	399.107	5-[(6-carboxy-3,4,5-trihydroxyoxan-2-yl)oxy]-2-phenyl-1??-chromen-1-ylium	C21H19O8			HMDB0133423			131837330
	48412	M	5	399.107	2-{2-[(6-carboxy-3,4,5-trihydroxyoxan-2-yl)oxy]phenyl}-1??-chromen-1-ylium	C21H19O8			HMDB0133415			131837322
	64578	M	5	399.107	8-[(6-carboxy-3,4,5-trihydroxyoxan-2-yl)oxy]-2-phenyl-1??-chromen-1-ylium	C21H19O8			HMDB0133422			131837329
	140646	M	5	399.107	(6-carboxy-3,4,5-trihydroxyoxan-2-yl)[4-(2H-chromen-2-ylidene)cyclohexa-2,5-dien-1-ylidene]oxidanium	C21H19O8			HMDB0133420			131837328
	138697	M	5	399.107	2-{3-[(6-carboxy-3,4,5-trihydroxyoxan-2-yl)oxy]phenyl}-1??-chromen-1-ylium	C21H19O8			HMDB0133418			131837325
	63210	M	5	399.107	7-[(6-carboxy-3,4,5-trihydroxyoxan-2-yl)oxy]-2-phenyl-1??-chromen-1-ylium	C21H19O8			HMDB0133417			131837324
	161828	M	7	399.107	Nocardicin E	C19H17N3O7	63555-59-9	C01739			65640
	160642	M	7	399.107	Nocardicin F	C19H17N3O7	63598-46-9	C17354			71628
174.011	0	M	0	0	No compounds found for experimental mass 174.0113 and adduct: M
340.039	0	M	0	0	No compounds found for experimental mass 340.0393 and adduct: M
395.997	0	M	0	0	No compounds found for experimental mass 395.9974 and adduct: M
318.027	0	M	0	0	No compounds found for experimental mass 318.0275 and adduct: M
277.064	0	M	0	0	No compounds found for experimental mass 277.0643 and adduct: M
374.108	165400	M	10	374.111	Portulacaxanthin II	C18H18N2O7	135545-98-1				64473
	173858	M	10	374.111	Tyr-Ala-OH	C18H18N2O7					64984
	173859	M	10	374.111	Ser-Phe-OH	C18H18N2O7					65017
	173860	M	10	374.111	TyrMe-Gly-OH	C18H18N2O7					65080
	173861	M	10	374.111	Ala-TyrMe-OH	C18H18N2O7					65091
	173862	M	10	374.111	Phe-Thr-OH	C18H18N2O7					65109
	173863	M	10	374.111	HoPhe-Ser-OH	C18H18N2O7					65154
	173864	M	10	374.111	Abu-Tyr-OH	C18H18N2O7					65170
	162998	M	10	374.111	Portulacaxanthin II	C18H18N2O7		C08565
	96310	M	10	374.111	Portulacaxanthin II	C18H18N2O7			HMDB0012281
586.046	0	M	0	0	No compounds found for experimental mass 586.0462 and adduct: M
450.009	0	M	0	0	No compounds found for experimental mass 450.0093 and adduct: M
325.918	0	M	0	0	No compounds found for experimental mass 325.9175 and adduct: M
492.11	0	M	0	0	No compounds found for experimental mass 492.11 and adduct: M
250.929	0	M	0	0	No compounds found for experimental mass 250.9287 and adduct: M
435.024	0	M	0	0	No compounds found for experimental mass 435.024 and adduct: M
335.939	0	M	0	0	No compounds found for experimental mass 335.9392 and adduct: M
499.172	156519	M	7	499.169	5-O-(Indol-3-ylacetyl-myo-inositol) D-galactoside	C22H29NO12		C04695			66241
230.142	162108	M	0	230.142	Camoensine	C14H18N2O		C10758			68555
	68110	M	0	230.142	Ibudilast	C14H18N2O	50847-11-5		HMDB0015614		85552	3671
533.294	0	M	0	0	No compounds found for experimental mass 533.2945 and adduct: M
274.15	167824	M	3	274.151	trans-trismethoxy Resveratrol-d4	C17H14D4O3					96499
246.067	117152	M	7	246.065	5'-Deoxy-5-fluorouridine	C9H11FN2O5		C12739	HMDB0060406		44123	18343
	65729	M	7	246.065	Floxuridine	C9H11FN2O5	50-91-9	C11736	HMDB0014467		4028	5790
201.994	161302	M	3	201.994	4-Sulfobenzoate; 4-Sulfobenzoic acid	C7H6O5S	636-78-2	C02236			65735	69469
373.964	0	M	0	0	No compounds found for experimental mass 373.9645 and adduct: M
470.145	179372	M	5	470.148	Nap-Phe-OH	C27H22N2O6					65011
	179373	M	5	470.148	Phe-Nap-OH	C27H22N2O6					65335
	154564	M	6	470.142	Plumieride	C21H26O12	511-89-7	C09797			67941	72319
451.119	0	M	0	0	No compounds found for experimental mass 451.1187 and adduct: M
541.181	0	M	0	0	No compounds found for experimental mass 541.1811 and adduct: M
760.074	0	M	0	0	No compounds found for experimental mass 760.0736 and adduct: M
565.324	0	M	0	0	No compounds found for experimental mass 565.3245 and adduct: M
588.043	0	M	0	0	No compounds found for experimental mass 588.0425 and adduct: M
303.111	0	M	0	0	No compounds found for experimental mass 303.1111 and adduct: M
410.05	0	M	0	0	No compounds found for experimental mass 410.0497 and adduct: M
550.071	0	M	0	0	No compounds found for experimental mass 550.071 and adduct: M
1106.61	10562	M	8	1106.6	PIM2(16:0/14:0)	C51H95O23P				LMGP15010050
403.004	0	M	0	0	No compounds found for experimental mass 403.0041 and adduct: M
483.921	0	M	0	0	No compounds found for experimental mass 483.9211 and adduct: M
555.298	0	M	0	0	No compounds found for experimental mass 555.2978 and adduct: M
696.167	0	M	0	0	No compounds found for experimental mass 696.167 and adduct: M
298.054	157379	M	0	298.054	Quinalphos	C12H15N2O3PS	13593-03-8	C11030			68785	26124
	159226	M	0	298.054	Phoxim	C12H15N2O3PS	14816-18-3	C18757			72530	9570290
808.076	0	M	0	0	No compounds found for experimental mass 808.0764 and adduct: M
516.12	0	M	0	0	No compounds found for experimental mass 516.1195 and adduct: M
445.142	0	M	0	0	No compounds found for experimental mass 445.1423 and adduct: M
496.93	0	M	0	0	No compounds found for experimental mass 496.9296 and adduct: M
494.932	0	M	0	0	No compounds found for experimental mass 494.9323 and adduct: M
539.149	161271	M	8	539.145	Piperacillin sodium; Pipracil	C23H26N5O7S.Na	59703-84-3	C07361				23666879
401.108	162833	M	1	401.109	Salbostatin 6'-phosphate	C13H24NO11P		C21211
	59981	M	9	401.104	Oxacillin	C19H19N3O5S	66-79-5	C07334	HMDB0014851		43286	6196
608.112	91775	M	8	608.117	Prodelphinidin A1	C30H24O14			HMDB0036336		91480	14521015
1142.18	0	M	0	0	No compounds found for experimental mass 1142.1776 and adduct: M
481.924	0	M	0	0	No compounds found for experimental mass 481.9239 and adduct: M
724.212	0	M	0	0	No compounds found for experimental mass 724.2117 and adduct: M
776.588	6672	M	7	776.593	PG(P-20:0/17:0)	C43H85O9P				LMGP04030064	79968
	6548	M	7	776.593	PG(O-18:0/19:1(9Z))	C43H85O9P				LMGP04020033	79844
	6564	M	7	776.593	PG(O-20:0/17:1(9Z))	C43H85O9P				LMGP04020049	79860
	6631	M	7	776.593	PG(P-16:0/21:0)	C43H85O9P				LMGP04030023	79927
	6652	M	7	776.593	PG(P-18:0/19:0)	C43H85O9P				LMGP04030044	79948
1104.19	0	M	0	0	No compounds found for experimental mass 1104.1907 and adduct: M
778.225	0	M	0	0	No compounds found for experimental mass 778.225 and adduct: M

## Sheet: Table S8
Supplementary Table S8: Search result from the accurate mass batch search (CEU mass mediator) of compounds found with higher abundance in ECM blank samples - RPLC ESI (+) mode
Experimental mass	Identifier	Adduct	mz Error (ppm)	Molecular Weight	Name (proposed annotation by CEU Mass Mediator Batch Search)	Formula	CAS	Kegg	HMDB	LipidMaps	Metlin	PubChem
472.397	0	M	0	0	No compounds found for experimental mass 472.3969 and adduct: M
106.043	50140	M	10	106.042	Benzaldehyde	C7H6O	100-52-7	C00193	HMDB0006115		58358	240
588.528	0	M	0	0	No compounds found for experimental mass 588.5283 and adduct: M
530.449	0	M	0	0	No compounds found for experimental mass 530.4495 and adduct: M
495.337	2628	M	9	495.332	PC(O-14:0/2:0)	C24H50NO7P				LMGP01020019	40048
	2981	M	9	495.332	PC(16:0/0:0)[rac]	C24H50NO7P				LMGP01050113	102768
	4290	M	9	495.332	PE(19:0/0:0)	C24H50NO7P				LMGP02050028	77694
	2969	M	9	495.332	PC(0:0/16:0)	C24H50NO7P			HMDB0240262	LMGP01050074	40340
	163400	M	9	495.332	PC(O-14:0/2:0)[U]	C24H50NO7P					40049
	163401	M	9	495.332	PC(16:0/0:0)[S]	C24H50NO7P					40285
	163402	M	9	495.332	PC(16:0/0:0)[U]	C24H50NO7P					40286
	163403	M	9	495.332	PC(0:0/16:0)[U]	C24H50NO7P					40341
	2940	M	9	495.332	PC(16:0/0:0)	C24H50NO7P			HMDB0010382	LMGP01050018	40284	460602
474.413	0	M	0	0	No compounds found for experimental mass 474.4127 and adduct: M
523.368	4288	M	8	523.364	PE(21:0/0:0)	C26H54NO7P				LMGP02050026	77692
	164538	M	8	523.364	PC(2:0/O-16:0)[U]	C26H54NO7P					40161
	2641	M	8	523.364	PC(O-16:0/2:0)	C26H54NO7P			HMDB0062195	LMGP01020046	40075	108156
	163439	M	8	523.364	PC(O-16:0/2:0)[S]	C26H54NO7P					40076
	163440	M	8	523.364	PC(O-16:0/2:0)[U]	C26H54NO7P					40077
	163441	M	8	523.364	PC(18:0/0:0)[S]	C26H54NO7P					40293
	163442	M	8	523.364	PC(18:0/0:0)[U]	C26H54NO7P					40294
	163443	M	8	523.364	PC(0:0/18:0)[S]	C26H54NO7P					40343
	163444	M	8	523.364	PC(0:0/18:0)[U]	C26H54NO7P					40344
	2944	M	8	523.364	PC(18:0/0:0)	C26H54NO7P			HMDB0010384	LMGP01050026	40292	497299
	2970	M	8	523.364	PC(0:0/18:0)	C26H54NO7P			HMDB0011128	LMGP01050076	40342	24779491
	163438	M	8	523.364	enantio-PAF C-16	C26H54NO7P	117985-57-6				43413
	165818	M	8	523.364	PAF C-16	C26H54NO7P	74389-68-7				34488
418.35	0	M	0	0	No compounds found for experimental mass 418.35 and adduct: M
269.205	167707	M	5	269.204	dinor-12-oxo Phytodienoic Acid-d5	C16H19D5O3					96439
429.378	0	M	0	0	No compounds found for experimental mass 429.3778 and adduct: M
474.411	0	M	0	0	No compounds found for experimental mass 474.4109 and adduct: M
462.375	40290	M	9	462.371	2alpha-(3-Hydroxypropyl)-1alpha,25-dihydroxy-19-norvitamin D3	C29H50O4				LMST03020627	42553
	123016	M	9	462.371	(3beta,22R,23R,24S)-3,22,23-Trihydroxystigmastan-6-one	C29H50O4			HMDB0039713		94268	73834440
	117689	M	9	462.371	6-Deoxohomodolichosterone	C29H50O4			HMDB0034430		89932	13870434
164.086	0	M	0	0	No compounds found for experimental mass 164.0859 and adduct: M
148.054	154485	M	7	148.052	3-Hydroxy-1-indanone	C9H8O2	26976-59-0	C07720			66724	176448
	160196	M	7	148.052	3-Isochromanone; 1,4-Dihydro-3H-2-benzopyran-3-one	C9H8O2	4385-35-7	C07728			44717	78092
	140583	M	7	148.052	1-Phenyl-1,2-propanedione	C9H8O2	579-07-7	C17268	HMDB0035243		63534	11363
	43331	M	7	148.052	Cinnamic acid	C9H8O2	621-82-9		HMDB0000567		310	5372954
	47243	M	7	148.052	Di-2-furanylmethane	C9H8O2	1197-40-6		HMDB0032947		88849	70972
	140691	M	7	148.052	trans-Cinnamic acid	C9H8O2	140-10-3	C00423	HMDB0000930		63104	444539
	106647	M	7	148.052	(E)-3-(4-Hydroxyphenyl)-2-propenal	C9H8O2		C05608	HMDB0040986		44643	641301
	122277	M	7	148.052	(E)-3-(2-Hydroxyphenyl)-2-propenal	C9H8O2			HMDB0031725		87897	5318169
	64249	M	7	148.052	3,4-Dihydro-2H-1-benzopyran-2-one	C9H8O2	119-84-6	C02274	HMDB0036626		65745	660
	99592	M	7	148.052	(2E)-3-(3-hydroxyphenyl)prop-2-enal	C9H8O2			HMDB0135274			6538957
	92456	M	7	148.052	3-(2-hydroxyphenyl)prop-2-enal	C9H8O2			HMDB0134039			98373
	147513	M	7	148.052	3-phenylprop-2-enoic acid	C9H8O2			HMDB0128078			8784
	83814	M	7	148.052	3-phenyloxirane-2-carbaldehyde	C9H8O2			HMDB0135275			11194419
	89200	M	7	148.052	(2Z)-2-hydroxy-3-phenylprop-2-enal	C9H8O2			HMDB0135273			13170418
	144544	M	7	148.052	3-(4-hydroxyphenyl)prop-2-enal	C9H8O2			HMDB0135648			440733
	180755	M	7	148.052	C9:5	C9H8O2
467.383	159033	M	9	467.388	Lucidine B; Serratanine	C30H49N3O	71384-23-1	C09869			67977	442479
406.331	0	M	0	0	No compounds found for experimental mass 406.3306 and adduct: M
511.41	0	M	0	0	No compounds found for experimental mass 511.4097 and adduct: M
599.464	34053	M	9	599.458	N-(3E-hexadecenoyl)-deoxysphing-4-enine-1-sulfonate	C34H65NO5S				LMSP00000003	53896
773.283	0	M	0	0	No compounds found for experimental mass 773.2827 and adduct: M
687.517	138062	M	4	687.52	PE(15:0/P-18:1(11Z))	C38H74NO7P			HMDB0008918		60361	53479585
	111962	M	4	687.52	PC(14:1(9Z)/P-16:0)	C38H74NO7P			HMDB0007928		59378	53478639
	93813	M	4	687.52	PC(o-16:1(9Z)/14:1(9Z))	C38H74NO7P			HMDB0013410			53481703
	111515	M	4	687.52	PE(15:0/P-18:1(9Z))	C38H74NO7P			HMDB0008919		60362	53479586
	132026	M	4	687.52	PE(P-18:1(11Z)/15:0)	C38H74NO7P			HMDB0011403		62202	53480863
	141304	M	4	687.52	PE(P-18:1(9Z)/15:0)	C38H74NO7P			HMDB0011436		62231	53480892
	2811	M	4	687.52	PC(P-16:0/14:1(9Z))	C38H74NO7P			HMDB0011204	LMGP01030022	62034	52923876
	4177	M	4	687.52	PE(P-16:0/17:1(9Z))	C38H74NO7P				LMGP02030016	77594
	4200	M	4	687.52	PE(P-18:0/15:1(9Z))	C38H74NO7P				LMGP02030039	77617
	4087	M	4	687.52	PE(O-16:0/17:2(9Z,12Z))	C38H74NO7P				LMGP02020029	77508
606.389	0	M	0	0	No compounds found for experimental mass 606.3894 and adduct: M
736.617	160286	M	2	736.616	2-Methyl-6-solanyl-1,4-benzoquinol; 2-Methyl-6-nonaprenyl-benzene-1,4-diol; 2-Methyl-6-all-trans-nonaprenylbenzene-1,4-diol; 2-Methyl-6-solanesylbenzene-1,4-diol; MSBQ	C52H80O2		C17570			64000	44237185
700.549	34372	M	4	700.552	SM(d16:1/18:1)	C39H77N2O6P				LMSP03010040	83741
	34373	M	4	700.552	SM(d18:1/16:1)	C39H77N2O6P				LMSP03010041	83742
	34421	M	4	700.552	SM(d18:2/16:0)	C39H77N2O6P				LMSP03010090	83790
	34466	M	4	700.552	PE-Cer(d14:2(4E,6E)/23:0)	C39H77N2O6P				LMSP03020041	103080
	34470	M	4	700.552	PE-Cer(d15:2(4E,6E)/22:0)	C39H77N2O6P				LMSP03020045	103084
	34482	M	4	700.552	PE-Cer(d16:2(4E,6E)/21:0)	C39H77N2O6P				LMSP03020057	103096
292.207	0	M	0	0	No compounds found for experimental mass 292.2074 and adduct: M
490.288	157995	M	10	490.293	Hemibrevetoxin B	C28H42O7	122271-91-4	C20016			73501
	77140	M	10	490.293	Macrocarpal I	C28H42O7	179388-54-6		HMDB0041587		95967	56776316
	41212	M	10	490.293	Ximaosteroid D	C28H42O7				LMST05050007	84927

## Sheet: Table S9
Supplementary Table S9: Search result from the accurate mass batch search (CEU mass mediator) of compounds found with higher abundance in ECM blank samples - RPLC ESI (-) mode
Experimental mass	Identifier	Adduct	mz Error (ppm)	Molecular Weight	Name (proposed annotation by CEU Mass Mediator Batch Search)	Formula	CAS	Kegg	HMDB	LipidMaps	Metlin	PubChem
282.259	0	M	0	0	No compounds found for experimental mass 282.2589 and adduct: M
280.244	0	M	0	0	No compounds found for experimental mass 280.2444 and adduct: M
217.108	52438	M	3	217.108	5-Hydroxysebacate	C10H17O5			HMDB0029189			131750806
	153545	M	9	217.106	N-Acetyl-L-citrulline	C8H15N3O4		C15532				656979
	165180	M	9	217.106	N-a-Acetylcitrulline	C8H15N3O4	33965-42-3				5819
	165181	M	9	217.106	Gamma-glutamyl-Alanine	C8H15N3O4					86034
	166735	M	9	217.106	Ala Gly Ala	C8H15N3O4					16009
	166736	M	9	217.106	Ala Ala Gly	C8H15N3O4					17382
	166737	M	9	217.106	Gly Ala Ala	C8H15N3O4					18391
	166738	M	9	217.106	Gln Ala	C8H15N3O4					23736
	166739	M	9	217.106	Ala Gln	C8H15N3O4					23902
	100400	M	9	217.106	N-a-Acetylcitrulline	C8H15N3O4			HMDB0000856			11506771
	90074	M	9	217.106	Alanyl-Glutamine	C8H15N3O4			HMDB0028685		85601	542027
	59638	M	9	217.106	Alanyl-Gamma-glutamate	C8H15N3O4			HMDB0028701		85616	131750731
	147138	M	9	217.106	Glutaminylalanine	C8H15N3O4			HMDB0028790		85704	9813211
	45418	M	10	217.11	Glutethimide	C13H15NO2	77-21-4	C07489	HMDB0015505		66661	3487
	111595	M	10	217.11	N-desisopropylpropranolol	C13H15NO2			HMDB0060961			159899
	153060	M	10	217.11	Pyracarbolid	C13H15NO2	24691-76-7	C18914			72675	32597
	157421	M	10	217.11	Securinine	C13H15NO2	5610-40-2	C10614			43991	442872
855.303	0	M	0	0	No compounds found for experimental mass 855.3034 and adduct: M
278.227	31501	M	9	278.225	10E,12E,14E-Hexadecatrienyl acetate	C18H30O2				LMFA07010350	46349
	31503	M	9	278.225	10E,12E,14Z-Hexadecatrienyl acetate	C18H30O2				LMFA07010352	46351
	31504	M	9	278.225	4E,6E,10Z-Hexadecatrienyl acetate	C18H30O2				LMFA07010353	46352
	31505	M	9	278.225	4E,6E,11Z-Hexadecatrienyl acetate	C18H30O2				LMFA07010354	46353
	31511	M	9	278.225	4E,6Z,10Z-Hexadecatrienyl acetate	C18H30O2				LMFA07010360	46359
	31515	M	9	278.225	13Z-Hexadecen-11-ynyl acetate	C18H30O2				LMFA07010364	46363
	26399	M	9	278.225	Columbinic acid	C18H30O2				LMFA01030815	45817
	31521	M	9	278.225	11Z,13E,15-Hexadecatrienyl acetate	C18H30O2				LMFA07010370	46369
	27946	M	9	278.225	Rumelenic acid	C18H30O2				LMFA02000299
	27459	M	9	278.225	Gorlic acid	C18H30O2				LMFA01140020	45900
	26467	M	9	278.225	Catalpic acid	C18H30O2				LMFA01030883	74419
	26217	M	9	278.225	Ximenynic acid	C18H30O2				LMFA01030560	74217
	26218	M	9	278.225	11Z-octadecen-9-ynoic acid	C18H30O2				LMFA01030561	74218
	26219	M	9	278.225	17-octadecen-9-ynoic acid	C18H30O2				LMFA01030562	74219
	26004	M	9	278.225	2E,9Z,12Z-octadecatrienoic acid	C18H30O2				LMFA01030339	74011
	26005	M	9	278.225	5,8,11-octadecatrienoic acid	C18H30O2				LMFA01030341	74012
	26006	M	9	278.225	5,9,12-octadecatrienoic acid	C18H30O2				LMFA01030342	74013
	26007	M	9	278.225	5Z,9Z,12E-octadecatrienoic acid	C18H30O2				LMFA01030343	74014
	26008	M	9	278.225	Pinolenic acid	C18H30O2				LMFA01030344
	26009	M	9	278.225	7E,9Z,12Z-octadecatrienoic acid	C18H30O2				LMFA01030345	74016
	26010	M	9	278.225	7Z,9Z,12Z-octadecatrienoic acid	C18H30O2				LMFA01030346	74017
	25499	M	9	278.225	16-methyl-6Z,9Z,12Z-heptadecatrienoic acid	C18H30O2				LMFA01020209	73655
	26011	M	9	278.225	9E,11Z,13Z-octadecatrienoic acid	C18H30O2				LMFA01030347	74018
	26012	M	9	278.225	9E,12E,15Z-octadecatrienoic acid	C18H30O2				LMFA01030348	74019
	26013	M	9	278.225	9E,12Z,15E-octadecatrienoic acid	C18H30O2				LMFA01030349	74020
	26014	M	9	278.225	9E,12Z,15Z-octadecatrienoic acid	C18H30O2				LMFA01030350	74021
	26015	M	9	278.225	9Z,12E,15E-octadecatrienoic acid	C18H30O2				LMFA01030351	74022
	26016	M	9	278.225	9Z,12E,15Z-octadecatrienoic acid	C18H30O2				LMFA01030352	74023
	26017	M	9	278.225	9Z,12Z,15E-octadecatrienoic acid	C18H30O2				LMFA01030353	74024
	31692	M	9	278.225	(E,E)-3,7,11-Trimethyl-2,6,10-dodecatrienyl propionate	C18H30O2				LMFA07010541	97247
	25819	M	9	278.225	Caleic acid	C18H30O2				LMFA01030140	73848
	26331	M	9	278.225	9E-Octadecen-12-ynoic acid	C18H30O2				LMFA01030741	74331
	26332	M	9	278.225	Crepenynic acid	C18H30O2		C07289		LMFA01030742	35331	5281024
	25821	M	9	278.225	6,10,14-octadecatrienoic acid	C18H30O2				LMFA01030142	73849
	25822	M	9	278.225	Jacaric acid	C18H30O2				LMFA01030143	73850
	39390	M	9	278.225	estrane-3alpha,17alpha-diol	C18H30O2				LMST02010019	84283
	25824	M	9	278.225	beta-calendic acid	C18H30O2				LMFA01030145	34819
	25825	M	9	278.225	Punicic acid	C18H30O2		C08364		LMFA01030146	34820	5281126
	25826	M	9	278.225	alpha-eleostearic acid	C18H30O2		C08315		LMFA01030147	34821	5281115
	25827	M	9	278.225	beta-eleostearic acid	C18H30O2				LMFA01030148	34822
	25828	M	9	278.225	9,12,14-octadecatrienoic acid	C18H30O2				LMFA01030151	73851
	25830	M	9	278.225	Elaidolinolenic acid	C18H30O2				LMFA01030153	34824
	25831	M	9	278.225	10,12,14-octadecatrienoic acid	C18H30O2				LMFA01030154	96766
	25832	M	9	278.225	Pseudoeleostearic acid	C18H30O2				LMFA01030155	96767
	25833	M	9	278.225	10,12,15-octadecatrienoic acid	C18H30O2				LMFA01030156	73852
	26359	M	9	278.225	octadeca-9Z,11E,14Z-trienoic acid	C18H30O2				LMFA01030773	45782
	26361	M	9	278.225	(R)-lamenallenic acid	C18H30O2				LMFA01030775	74349
	26362	M	9	278.225	(S)-lamenallenic acid	C18H30O2				LMFA01030776	74350
	26363	M	9	278.225	octadeca-11E,13E,15Z-trienoic acid	C18H30O2				LMFA01030777	45783
	104503	M	9	278.225	Linolenelaidic acid	C18H30O2	28290-79-1		HMDB0030964			860
	26504	M	9	278.225	9E,11Z,13E-octadecatrienoic acid	C18H30O2			HMDB0030963	LMFA01030923		12309425
	25820	M	9	278.225	gamma-Linolenic acid	C18H30O2		C06426	HMDB0003073	LMFA01030141	386	5280933
	25823	M	9	278.225	alpha-calendic acid	C18H30O2			HMDB0030962	LMFA01030144	34818	5282818
	25829	M	9	278.225	alpha-Linolenic acid	C18H30O2		C06427	HMDB0001388	LMFA01030152	192	5280934
	180701	M	9	278.225	C18:3	C18H30O2
	27945	M	9	278.225	Isorumelenic acid	C18H30O2				LMFA02000298
	27966	M	9	278.225	3Z,6Z,9Z-Octadecatrienoic acid	C18H30O2				LMFA02000319
	168002	M	9	278.225	3E,9Z,12Z-Octadecatrienoic acid	C18H30O2					34815
	168003	M	9	278.225	6,10,14-Octadecatrienoic acid	C18H30O2					34816
	168004	M	9	278.225	8Z,10E,12Z-Octadecatrienoic acid	C18H30O2					34817
	168005	M	9	278.225	9,12,14-Octadecatrienoic acid	C18H30O2					34823
	168006	M	9	278.225	10,12,15-Octadecatrienoic acid	C18H30O2					34826
	168007	M	9	278.225	2E,9Z,12Z-octadecatrienoic acid	C18H30O2					35003
	168008	M	9	278.225	5,8,11-octadecatrienoic acid	C18H30O2					35005
	168009	M	9	278.225	5,9,12-octadecatrienoic acid	C18H30O2					35006
	168010	M	9	278.225	5Z,9Z,12E-octadecatrienoic acid	C18H30O2					35007
	168011	M	9	278.225	Pinolenic Acid	C18H30O2	16833-54-8				35008
	168012	M	9	278.225	7E,9Z,12Z-octadecatrienoic acid	C18H30O2					35009
	168013	M	9	278.225	7Z,9Z,12Z-octadecatrienoic acid	C18H30O2					35010
	168014	M	9	278.225	9E,11Z,13Z-octadecatrienoic acid	C18H30O2					35011
	168015	M	9	278.225	9E,12E,15Z-octadecatrienoic acid	C18H30O2					35012
	168016	M	9	278.225	9E,12Z,15E-octadecatrienoic acid	C18H30O2					35013
	27473	M	9	278.225	Isogorlic acid	C18H30O2				LMFA01140035
	168017	M	9	278.225	9E,12Z,15Z-octadecatrienoic acid	C18H30O2					35014
	168018	M	9	278.225	9Z,12E,15E-octadecatrienoic acid	C18H30O2					35015
	168019	M	9	278.225	9Z,12E,15Z-octadecatrienoic acid	C18H30O2					35016
	168020	M	9	278.225	9Z,12Z,15E-octadecatrienoic acid	C18H30O2					35017
	168021	M	9	278.225	11E-octadecen-9-ynoic acid	C18H30O2					35214
	168022	M	9	278.225	11Z-octadecen-9-ynoic acid	C18H30O2					35215
	168023	M	9	278.225	17-octadecen-9-ynoic acid	C18H30O2					35216
	27480	M	9	278.225	13-(2-Cyclopentenyl)-9Z-tridecenoic acid	C18H30O2				LMFA01140042
	168024	M	9	278.225	9E-Octadecen-12-ynoic acid	C18H30O2					35330
	168025	M	9	278.225	8-Hydroxy-15,16-Bisnor-11-Labden-13-One	C18H30O2					43976
	27500	M	9	278.225	2-(1,2-tetra-decadienyl)-cyclopropanecarboxylic acid	C18H30O2				LMFA01140062
	164247	M	9	278.225	octadeca-5S,6,16E-trienoic acid	C18H30O2					35004
	164248	M	9	278.225	octadeca-9Z,11E,15Z-trienoic acid	C18H30O2					45784
	26556	M	9	278.225	Alvaradoic acid	C18H30O2				LMFA01031029
	26557	M	9	278.225	Alvaradonic acid	C18H30O2				LMFA01031030
	154052	M	9	278.225	5beta-Estrane-3alpha,17beta-diol; 19-Nor-5beta-androstane-3alpha,17beta-diol	C18H30O2		C15201			41821	255697
	26566	M	9	278.225	Xionenynic acid	C18H30O2				LMFA01031039
	26574	M	9	278.225	7E-Octadecen-9-ynoic acid	C18H30O2				LMFA01031047
	26582	M	9	278.225	3Z,9Z,12Z-Octadecatrienoic acid	C18H30O2				LMFA01031055
254.227	26392	M	9	254.225	Hypogeic acid	C16H30O2				LMFA01030808	45810
	26438	M	9	254.225	16:1(5Z)	C16H30O2				LMFA01030854	74390
	25927	M	9	254.225	10-hexadecenoic acid	C16H30O2				LMFA01030260	73935
	25929	M	9	254.225	cis-Palmitvaccenic acid	C16H30O2				LMFA01030262	73937
	25930	M	9	254.225	13-hexadecenoic acid	C16H30O2				LMFA01030263	73938
	25932	M	9	254.225	2Z-hexadecenoic acid	C16H30O2				LMFA01030265	34929
	25933	M	9	254.225	3E-hexadecenoic acid	C16H30O2				LMFA01030266	73941
	25934	M	9	254.225	Sapienic acid	C16H30O2				LMFA01030267	73942
	25428	M	9	254.225	2,4-dimethyl-2E-tetradecenoic acid	C16H30O2				LMFA01020133	73589
	25434	M	9	254.225	14-methyl-4-pentadecenoic acid	C16H30O2				LMFA01020140	73595
	25435	M	9	254.225	2-hexyl-2-decenoic acid	C16H30O2				LMFA01020141	73596
	25436	M	9	254.225	6-isopentyl-9-methyl-5-decenoic acid	C16H30O2				LMFA01020142	73597
	26477	M	9	254.225	15:1(4)(13Me)	C16H30O2				LMFA01030893	74429
	26478	M	9	254.225	16:1(4)	C16H30O2				LMFA01030894	74430
	25739	M	9	254.225	cis-10-palmitoleic acid	C16H30O2				LMFA01030058	34745
	31642	M	9	254.225	ethyl 7E-tetradecenoate	C16H30O2				LMFA07010491	97213
	31643	M	9	254.225	ethyl 9E-tetradecenoate	C16H30O2				LMFA07010492	97214
	31645	M	9	254.225	ethyl 9Z-tetradecenoate	C16H30O2				LMFA07010494	97215
	31666	M	9	254.225	dodecyl 2E-butenoate	C16H30O2				LMFA07010515	97225
	31688	M	9	254.225	(Z)-7-Dodecenyl butyrate	C16H30O2				LMFA07010537	97243
	31434	M	9	254.225	10E-Tetradecenyl acetate	C16H30O2				LMFA07010283	46282
	31436	M	9	254.225	11E-Tetradecenyl acetate	C16H30O2				LMFA07010285	46284
	31437	M	9	254.225	12E-Tetradecenyl acetate	C16H30O2				LMFA07010286	46285
	31438	M	9	254.225	3E-Tetradecenyl acetate	C16H30O2				LMFA07010287	46286
	31439	M	9	254.225	5E-Tetradecenyl acetate	C16H30O2				LMFA07010288	46287
	31440	M	9	254.225	6E-Tetradecenyl acetate	C16H30O2				LMFA07010289	46288
	31441	M	9	254.225	7E-Tetradecenyl acetate	C16H30O2				LMFA07010290	46289
	31442	M	9	254.225	8E-Tetradecenyl acetate	C16H30O2				LMFA07010291	46290
	31444	M	9	254.225	9E-Tetradecenyl acetate	C16H30O2				LMFA07010293	46292
	32221	M	9	254.225	Vittatalactone	C16H30O2				LMFA07040032	97389
	31458	M	9	254.225	10Z-Tetradecenyl acetate	C16H30O2				LMFA07010307	46306
	31460	M	9	254.225	11Z-Tetradecenyl acetate	C16H30O2				LMFA07010309	46308
	31461	M	9	254.225	12Z-Tetradecenyl acetate	C16H30O2				LMFA07010310	46309
	31462	M	9	254.225	3Z-Tetradecenyl acetate	C16H30O2				LMFA07010311	46310
	31463	M	9	254.225	5Z-Tetradecenyl acetate	C16H30O2				LMFA07010312	46311
	31464	M	9	254.225	6Z-Tetradecenyl acetate	C16H30O2				LMFA07010313	46312
	31465	M	9	254.225	7Z-Tetradecenyl acetate	C16H30O2				LMFA07010314	46313
	31466	M	9	254.225	8Z-Tetradecenyl acetate	C16H30O2				LMFA07010315	46314
	31467	M	9	254.225	9Z-Tetradecenyl acetate	C16H30O2				LMFA07010316	46315
	32241	M	9	254.225	15R-Hexadecanolide	C16H30O2				LMFA07040052	97405
	32243	M	9	254.225	16-Hexadecanolide	C16H30O2				LMFA07040054	97407
	32244	M	9	254.225	delta-hexadecalactone	C16H30O2				LMFA07040055	97408
	25928	M	9	254.225	Lycopodic acid	C16H30O2			HMDB0037647	LMFA01030261	73936	5312413
	25931	M	9	254.225	13Z-hexadecenoic acid	C16H30O2			HMDB0035877	LMFA01030264	73939	5312416
	75875	M	9	254.225	5-Dodecyldihydro-2(3H)-furanone	C16H30O2	730-46-1		HMDB0031145		87443	97747
	25735	M	9	254.225	Gaidic acid	C16H30O2			HMDB0010735	LMFA01030054	34742	5282743
	25736	M	9	254.225	7Z-palmitoleic acid	C16H30O2			HMDB0002186	LMFA01030055	34743	5318393
	25737	M	9	254.225	cis-9-palmitoleic acid	C16H30O2		C08362	HMDB0003229	LMFA01030056	188	445638
	25738	M	9	254.225	trans-9-palmitoleic acid	C16H30O2			HMDB0012328	LMFA01030057	34744	5282745
	31924	M	9	254.225	Citronellyl hexanoate	C16H30O2			HMDB0038958	LMFA07010816	93569	114416
	111800	M	9	254.225	15-Hexadecanolide	C16H30O2			HMDB0031711		87885	543385
	94922	M	9	254.225	(Z)-5-Hexadecenoic acid	C16H30O2			HMDB0032638		88581	13105359
	107503	M	9	254.225	(Z)-14-Methyl-6-pentadecenoic acid	C16H30O2			HMDB0041422		95819	87508980
	26609	M	9	254.225	6E-Hexadecenoic acid	C16H30O2			HMDB0031053	LMFA01031082		5282744
	147443	M	9	254.225	(E)-3-Hexadecenoic acid	C16H30O2			HMDB0033791		89535	5355370
	180632	M	9	254.225	C16:1	C16H30O2
	27482	M	9	254.225	6,7-methylene-pentadecanoic acid	C16H30O2				LMFA01140044
	164214	M	9	254.225	hexadec-7Z-enoic acid	C16H30O2					74346
	167369	M	9	254.225	10-Hexadecenoic acid	C16H30O2					34924
	167370	M	9	254.225	11-Hexadecenoic acid	C16H30O2					34925
	167371	M	9	254.225	11Z-Hexadecenoic acid	C16H30O2					34926
	167372	M	9	254.225	13-Hexadecenoic acid	C16H30O2					34927
	167373	M	9	254.225	13Z-Hexadecenoic acid	C16H30O2					34928
	167374	M	9	254.225	3E-Hexadecenoic acid	C16H30O2					34930
	167375	M	9	254.225	6Z-Hexadecenoic acid	C16H30O2					34931
	167376	M	9	254.225	cis-7-Hexadecenoic Acid	C16H30O2	2416-19-5				45058
	167377	M	9	254.225	?2-trans-Hexadecenoic Acid	C16H30O2	929-79-3				96484
	167378	M	9	254.225	?2-cis-Hexadecenoic Acid	C16H30O2	2825-68-5				96485
	26608	M	9	254.225	8Z-Hexadecenoic acid	C16H30O2				LMFA01031081
304.243	39429	M	9	304.24	Methandriol	C20H32O2		C14493		LMST02020012	41839	229021
	39438	M	9	304.24	Mestanolone	C20H32O2				LMST02020027	41846
	26400	M	9	304.24	2E,8Z,11Z,14Z-Eicosatetraenoic acid	C20H32O2				LMFA01030816	74352
	26401	M	9	304.24	5(E)-Arachidonic acid	C20H32O2				LMFA01030817	74353
	25635	M	9	304.24	16:3(2E,10E,12E)(3Me,5Me[R],7My,15Me)	C20H32O2				LMFA01020367	73777
	25648	M	9	304.24	17:4(2E,4E,9E,11E)(8Me[R],10Me,15Me[R])	C20H32O2				LMFA01020381	73790
	27445	M	9	304.24	8-[3]-ladderane-octanoic acid	C20H32O2				LMFA01140006	74893
	590	M	9	304.24	(+)-Serradiol	C20H32O2				LMPR0104150006	53642
	26455	M	9	304.24	20:4(5Z,13Z,16Z,19Z)	C20H32O2				LMFA01030871	74407
	26488	M	9	304.24	17:4(2E,4E,9E,11E)(7Me[R],10Me,13Me[S])	C20H32O2				LMFA01030905	74440
	26489	M	9	304.24	16:3(2E,9E,11E)(3Me,5Me[S],7My,15Me)	C20H32O2				LMFA01030906	74441
	636	M	9	304.24	(-)-Cladielline	C20H32O2				LMPR0104210003	53661
	646	M	9	304.24	(-)-Amijiol	C20H32O2				LMPR0104250001	53671
	647	M	9	304.24	(-)-Isoamijiol	C20H32O2				LMPR0104250002	53672
	678	M	9	304.24	Taxa-4(20),11(12)-dien-5alpha,13alpha-diol	C20H32O2		C11897		LMPR0104390005	41259	443487
	25512	M	9	304.24	18-methyl-5Z,8Z,11Z,14Z-nonadecatetraenoic acid	C20H32O2				LMFA01020222	73668
	682	M	9	304.24	Isotrinervidiol	C20H32O2				LMPR0104400003	53699
	26288	M	9	304.24	7,13-Eicosadiynoic acid	C20H32O2				LMFA01030687	74288
	26289	M	9	304.24	8,11-Eicosadiynoic acid	C20H32O2				LMFA01030688	24087
	26290	M	9	304.24	10,13-Eicosadiynoic acid	C20H32O2				LMFA01030689	74290
	696	M	9	304.24	Acutilol A	C20H32O2		C09057		LMPR0104470001	53713	441999
	706	M	9	304.24	(-)-Reiswigin A	C20H32O2				LMPR0104530002	53723
	26052	M	9	304.24	4,7,10,13-Eicosatetraenoic acid	C20H32O2				LMFA01030389	74056
	26053	M	9	304.24	4Z,7Z,10Z,13Z-eicosatetraenoic acid	C20H32O2				LMFA01030390	74057
	26054	M	9	304.24	4Z,8Z,11Z,14Z-eicosatetraenoic acid	C20H32O2				LMFA01030391	74058
	26055	M	9	304.24	5,11,14,17-Eicosatetraenoic acid	C20H32O2				LMFA01030392	74059
	26056	M	9	304.24	5,8,11,14-eicosatetraenoic acid	C20H32O2				LMFA01030393	74060
	26057	M	9	304.24	Juniperonic acid	C20H32O2				LMFA01030394	74061
	26058	M	9	304.24	8Z,11Z,14Z,18Z-eicosatetraenoic acid	C20H32O2				LMFA01030395	74062
	25847	M	9	304.24	4,8,12,16-eicosatetraenoic acid	C20H32O2				LMFA01030173	73864
	25848	M	9	304.24	6,10,14,18-eicosatetraenoic acid	C20H32O2				LMFA01030175	73865
	25849	M	9	304.24	8,11,14,17-eicosatetraenoic acid	C20H32O2				LMFA01030176
	79374	M	9	304.24	Sideridiol	C20H32O2			HMDB0036702		91734	12315540
	83987	M	9	304.24	Drostanolone	C20H32O2	58-19-5	C14605	HMDB0014996		70197	6011
	93716	M	9	304.24	Junicedral	C20H32O2			HMDB0036830		91843	131752060
	26402	M	9	304.24	omega-3-Arachidonic acid	C20H32O2			HMDB0002177	LMFA01030818	74354	11722594
	43320	M	9	304.24	Yucalexin P21	C20H32O2			HMDB0036754		91781	14191208
	39494	M	9	304.24	Mesterolone	C20H32O2			HMDB0006036	LMST02020107	57837	15020
	115274	M	9	304.24	Oryzalexin S	C20H32O2			HMDB0039687		94242	131752705
	25683	M	9	304.24	Arachidonic acid	C20H32O2		C00219	HMDB0001043	LMFA01030001	193	444899
	101717	M	9	304.24	Oryzalexin E	C20H32O2		C21561	HMDB0039702		94257	86289490
	146831	M	9	304.24	Copalic acid	C20H32O2	20257-75-4		HMDB0036829		91842	131752059
	62411	M	9	304.24	ent-17-Hydroxy-16beta-kauran-19-al	C20H32O2			HMDB0036721		91751	3481851
	46288	M	9	304.24	7,13-Eperudien-15-oic acid	C20H32O2			HMDB0037824		92634	131752241
	180735	M	9	304.24	C20:4	C20H32O2
	151303	M	9	304.24	17-Methyl-5alpha-androst-2-ene-1alpha,17beta-diol	C20H32O2		C15176			70666	254634
	161596	M	9	304.24	2-Ketoepimanool	C20H32O2		C09124			67447	442052
	151377	M	9	304.24	3beta-Methoxyandrost-5-en-16beta-ol	C20H32O2		C15367			70839	234498
	161138	M	9	304.24	17beta-Hydroxy-4alpha-methyl-5alpha-androstan-3-one; 4,5alpha-Dihydro-4alpha-methyltestosterone	C20H32O2		C15252			70729	11954137
	169103	M	9	304.24	4,8,12,16-Eicosatetraenoic acid	C20H32O2					34842
	169104	M	9	304.24	6,10,14,18-Eicosatetraenoic acid	C20H32O2					34843
	169105	M	9	304.24	8,11,14,17-Eicosatetraenoic acid	C20H32O2					34844
	169106	M	9	304.24	4,7,10,13-Eicosatetraenoic acid	C20H32O2					35052
	169107	M	9	304.24	4Z,7Z,10Z,13Z-eicosatetraenoic acid	C20H32O2					35053
	169108	M	9	304.24	4Z,8Z,11Z,14Z-eicosatetraenoic acid	C20H32O2					35054
	169109	M	9	304.24	5,11,14,17-Eicosatetraenoic acid	C20H32O2					35055
	169110	M	9	304.24	5,8,11,14-Eicosatetraenoic acid / 5,8,11,14-icosatetraenoic acid	C20H32O2					35056
	169111	M	9	304.24	5Z,11Z,14Z,17Z-eicosatetraenoic acid	C20H32O2					35057
	169112	M	9	304.24	8Z,11Z,14Z,18Z-eicosatetraenoic acid	C20H32O2					35058
	169113	M	9	304.24	Stearidonic Acid ethyl ester	C20H32O2	119798-44-6				44955
	169114	M	9	304.24	omega-3 Arachidonic Acid	C20H32O2	24880-40-8				62952
	158369	M	9	304.24	3alpha-Hydroxy-2alpha-methyl-5alpha-androstan-17-one; 2alpha-Methylandrosterone	C20H32O2		C14956			70455	247863
	164284	M	9	304.24	8, 11, 14, 17-icosatetraenoic acid C20:4n-3,6,9,12	C20H32O2					73866
	154072	M	9	304.24	Dihydroabietic acid	C20H32O2	19407-37-5	C17920			71945	44150026
	26596	M	9	304.24	7Z,11Z,14Z,17Z-Eicosatetraenoic acid	C20H32O2				LMFA01031069
	161823	M	10	304.24	ent-2alpha,3alpha-Dihydroxyisokaurene	C20H32O2		C21831
	150105	M	10	304.24	Abieta-7,13-dien-18,18-diol	C20H32O2		C20329
	157869	M	10	304.24	ent-Cassa-12,15-diene-2beta,3beta-diol	C20H32O2		C21829
	160998	M	10	304.24	Oryzalexin D; ent-Sandaracopimaradiene-3beta,7alpha-diol	C20H32O2	110268-98-9	C21562
635.308	63112	M	3	635.31	Glycylserylprolylmethionylphenylalanylvalinamide	C29H45N7O7S			HMDB0033242		89109	71338674
769.325	0	M	0	0	No compounds found for experimental mass 769.3248 and adduct: M
955.297	0	M	0	0	No compounds found for experimental mass 955.2965 and adduct: M
801.331	0	M	0	0	No compounds found for experimental mass 801.3306 and adduct: M
330.259	152125	M	8	330.256	Ethyl icosapentate; Eicosapentaenoic acid, ethyl ester	C22H34O2	73310-10-8	C13364
	25856	M	8	330.256	7,10,13,16,19-docosapentaenoic acid	C22H34O2				LMFA01030184	73872
	39683	M	8	330.256	1alpha-hydroxy-23,24,25,26,27-pentanorvitamin D3 / 1alpha-hydroxy-23,24,25,26,27-pentanorcholecalciferol	C22H34O2				LMST03020009	41950
	39684	M	8	330.256	22-hydroxy-23,24,25,26,27-pentanorvitamin D3 / 22-hydroxy-23,24,25,26,27-pentanorcholecalciferol	C22H34O2				LMST03020010	41951
	27452	M	8	330.256	10-[5]-ladderane-decanoic acid	C22H34O2				LMFA01140013	45895
	677	M	8	330.256	Taxa-4(20),11(12)-dien-5alpha-yl acetate	C22H34O2		C11896		LMPR0104390004	41258	443486
	29359	M	8	330.256	docosapentaenoic acid	C22H34O2				LMFA04000049	46021
	25854	M	8	330.256	4,7,10,13,16-docosapentaenoic acid	C22H34O2				LMFA01030182	73870
	25855	M	8	330.256	4,8,12,15,19-docosapentaenoic acid	C22H34O2				LMFA01030183	73871
	79885	M	8	330.256	Ethyl abietate	C22H34O2	631-71-0		HMDB0032257		88305	61182
	121613	M	8	330.256	4,8,12,15,19-Docosapentaenoic acid	C22H34O2	2548-85-8		HMDB0039133		194	102281
	114984	M	8	330.256	1-Phenyl-1,3-hexadecanedione	C22H34O2			HMDB0035581		90861	19900903
	96073	M	8	330.256	ent-16-Kauren-19-ol acetate	C22H34O2			HMDB0035024		90383	537596
	29358	M	8	330.256	DPA	C22H34O2		C16513	HMDB0006528	LMFA04000044	24096	5497182
	29373	M	8	330.256	22:5(4Z,7Z,10Z,13Z,16Z)	C22H34O2			HMDB0001976	LMFA04000064	75223	6441454
	31971	M	8	330.256	Ethyl icosapentate	C22H34O2		C16184	HMDB0039530	LMFA07010877	45153	9831415
	57595	M	8	330.256	2-Methyl-5-(8,11-pentadecadienyl)-1,3-benzenediol	C22H34O2			HMDB0038909		93522	131752491
	180768	M	8	330.256	C22:5	C22H34O2
	153007	M	8	330.256	17beta-Hydroxy-4,4,17-trimethylandrost-5-en-3-one	C22H34O2		C15413			70882	225742
	29384	M	8	330.256	Clupadonic acid	C22H34O2				LMFA04000082
	170486	M	8	330.256	4,7,10,13,16-Docosapentaenoic acid	C22H34O2					34850
	170487	M	8	330.256	4,8,12,15,19-Docosapentaenoic acid	C22H34O2					34851
	170488	M	8	330.256	7,10,13,16,19-Docosapentaenoic acid	C22H34O2					34852
	155134	M	8	330.256	2-Methyl-5alpha-androst-2-en-17beta-ol acetate	C22H34O2		C15421			70890	249474
461.295	179157	M	4	461.293	AMC Arachidonoyl Amide	C30H39NO3					45116

[truncated: 2 more sheets: Table S10, Table S11]
